# Supplementary material for: Synthesis and Antiproliferative Activity of Phosphorus Substituted 4-Cyanooxazolines, 2-Aminocyanooxazolines, 2-Iminocyanooxazolidines and 2-Aminocyanothiazolines by Rearrangement of Cyanoaziridines
Source: MDPI journal article supplement (doi:10.3390/molecules26144265), 2021-07-14

## Supplementary Information

# Synthesis and antiproliferative activity of phosphorus substituted 4-cyanooxazolines, 2-aminocyanooxazolines, 2-iminocyanooxazolidines, and 2-aminocyanothiazolines by rearrangement of cyanoaziridines

Victor Carramiñana, Ana M. Ochoa de Retana, Francisco Palacios\*, Jesús M. de los Santos\*

Department of Organic Chemistry I, Faculty of Pharmacy and Lascaray Research Center, University of the Basque Country (UPV/EHU), Paseo de la Universidad 7, 01006 Vitoria, Spain.

\* Correspondence: [francisco.palacios@ehu.eus](mailto:francisco.palacios@ehu.eus) (F.P.); [jesus.delossantos@ehu.eus](mailto:jesus.delossantos@ehu.eus) (J.M.S.)

### Table of contents

|                                                                                                        |           |
|--------------------------------------------------------------------------------------------------------|-----------|
| <sup>1</sup> H and <sup>13</sup> C NMR spectra of <i>N</i> -acylaziridines <b>2</b>                    | Page S-2  |
| <sup>1</sup> H and <sup>13</sup> C NMR spectra of 4-cyanooxazoline <b>3a</b>                           | Page S-5  |
| <sup>1</sup> H and <sup>13</sup> C NMR spectra of <i>N</i> -functionalized cyanoaziridines <b>5a–k</b> | Page S-6  |
| <sup>1</sup> H and <sup>13</sup> C NMR spectra of <i>N</i> -thiocarbamoyl cyanoaziridines <b>6a–c</b>  | Page S-17 |
| <sup>1</sup> H and <sup>13</sup> C NMR spectra of oxazolines <b>7a–c</b>                               | Page S-20 |
| <sup>1</sup> H and <sup>13</sup> C NMR spectra of 2-aminothiazoline <b>8a</b>                          | Page S-24 |
| <sup>1</sup> H and <sup>13</sup> C NMR spectra of oxazolidines <b>9a–c</b>                             | Page S-25 |

$^1\text{H}$  NMR (300 MHz,  $\text{CDCl}_3$ ) of compound **2a**.

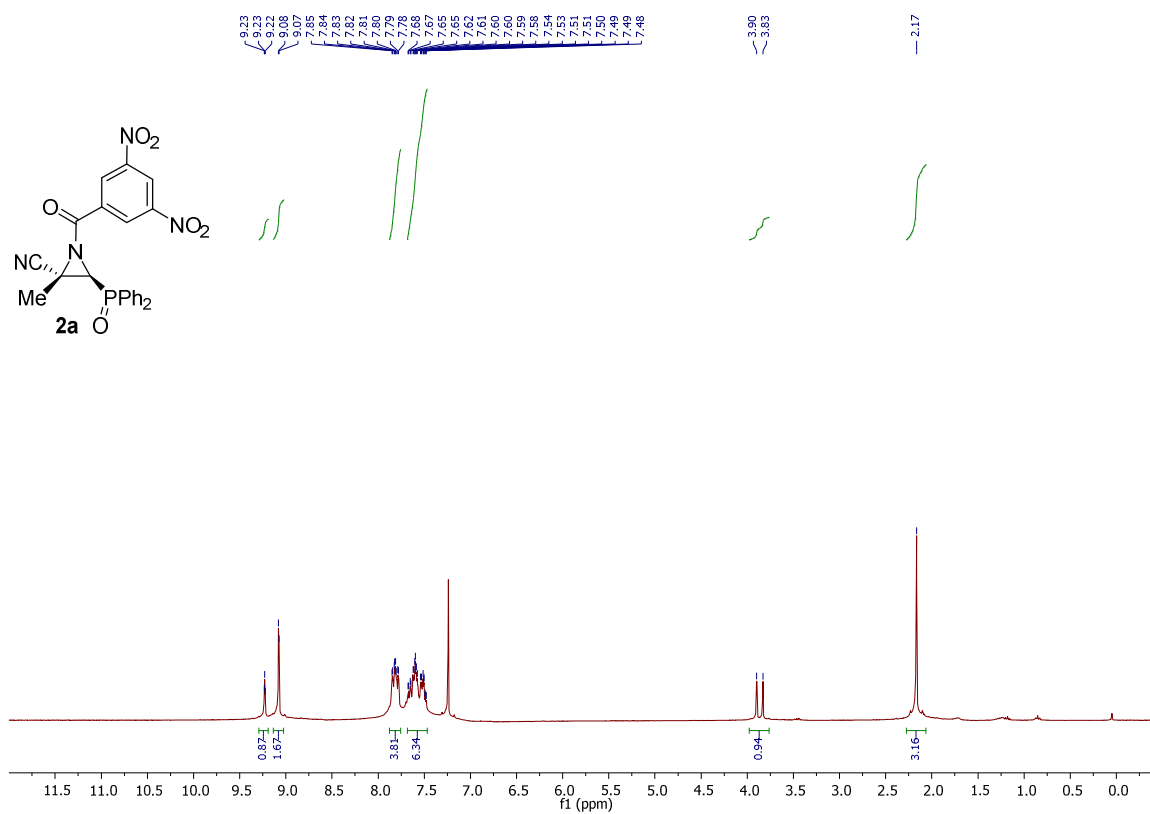

$^{13}\text{C}$  [ $^1\text{H}$ ] NMR (75 MHz,  $\text{CDCl}_3$ ) of compound **2a**.

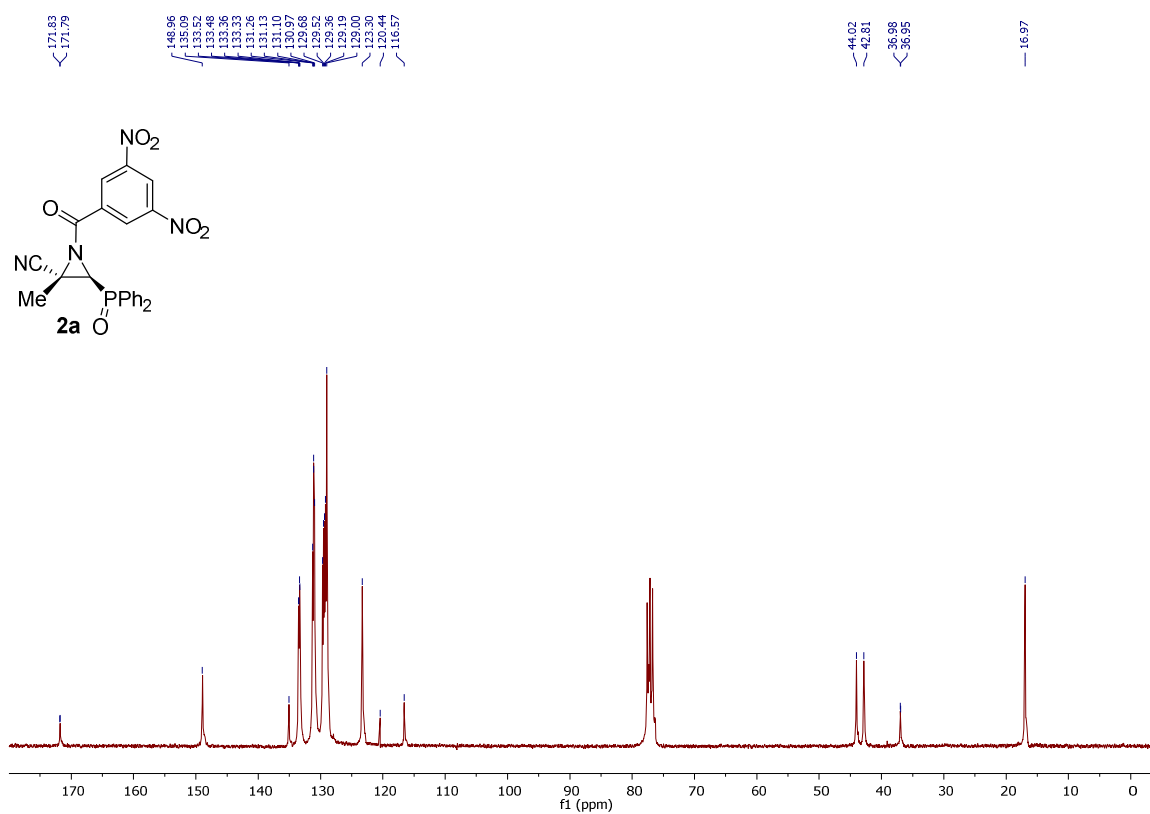

CC[C@H]1N(C(=O)c2ccc([N+](=O)[O-])cc2)C(=O)P(=O)(c3ccccc3)c3ccccc31  
**2b**

172.38  
 172.34  
 148.91  
 135.08  
 133.46  
 133.43  
 133.27  
 133.23  
 131.18  
 131.16  
 131.08  
 131.05  
 129.64  
 129.47  
 129.31  
 129.20  
 128.44  
 123.36  
 115.60  
 44.25  
 43.19  
 43.16  
 43.03  
 24.16  
 10.50

f1 (ppm)

$^1\text{H}$  NMR (300 MHz,  $\text{CDCl}_3$ ) of compound **2c**.

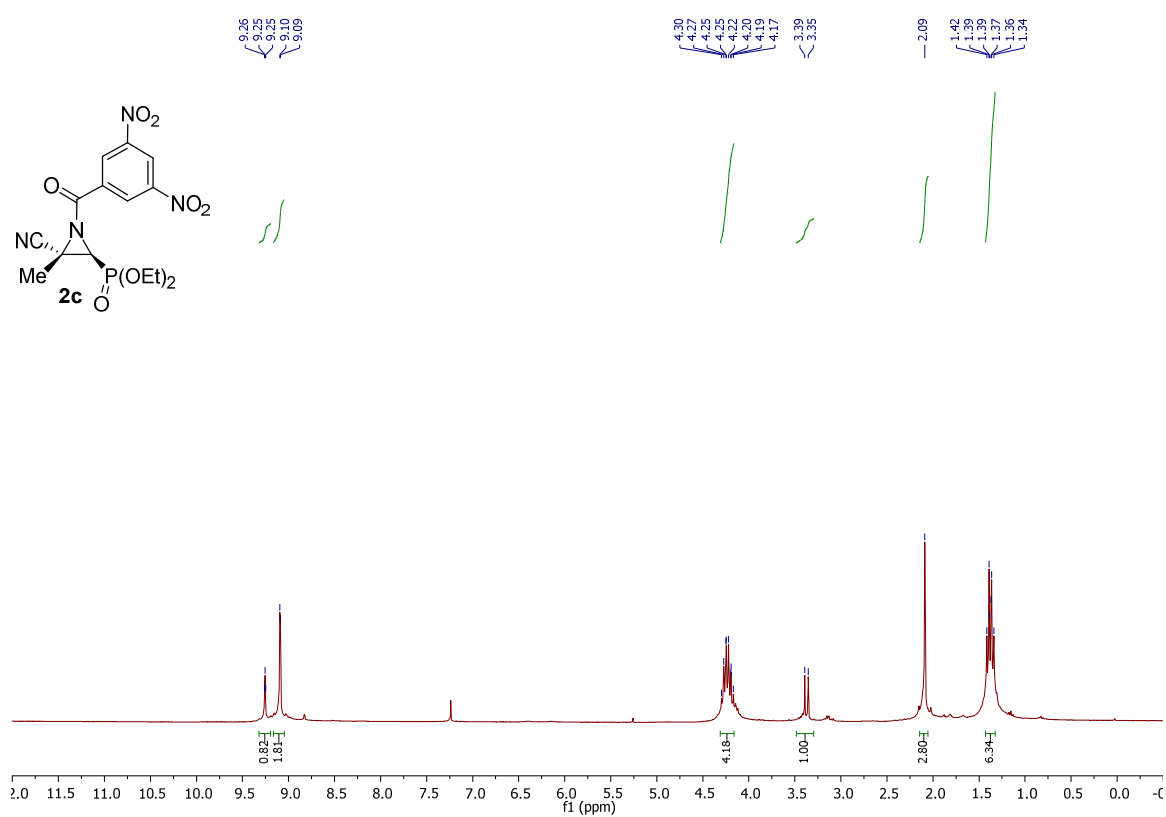

$^{13}\text{C}$   $\{^1\text{H}\}$  NMR (75 MHz,  $\text{CDCl}_3$ ) of compound **2c**.

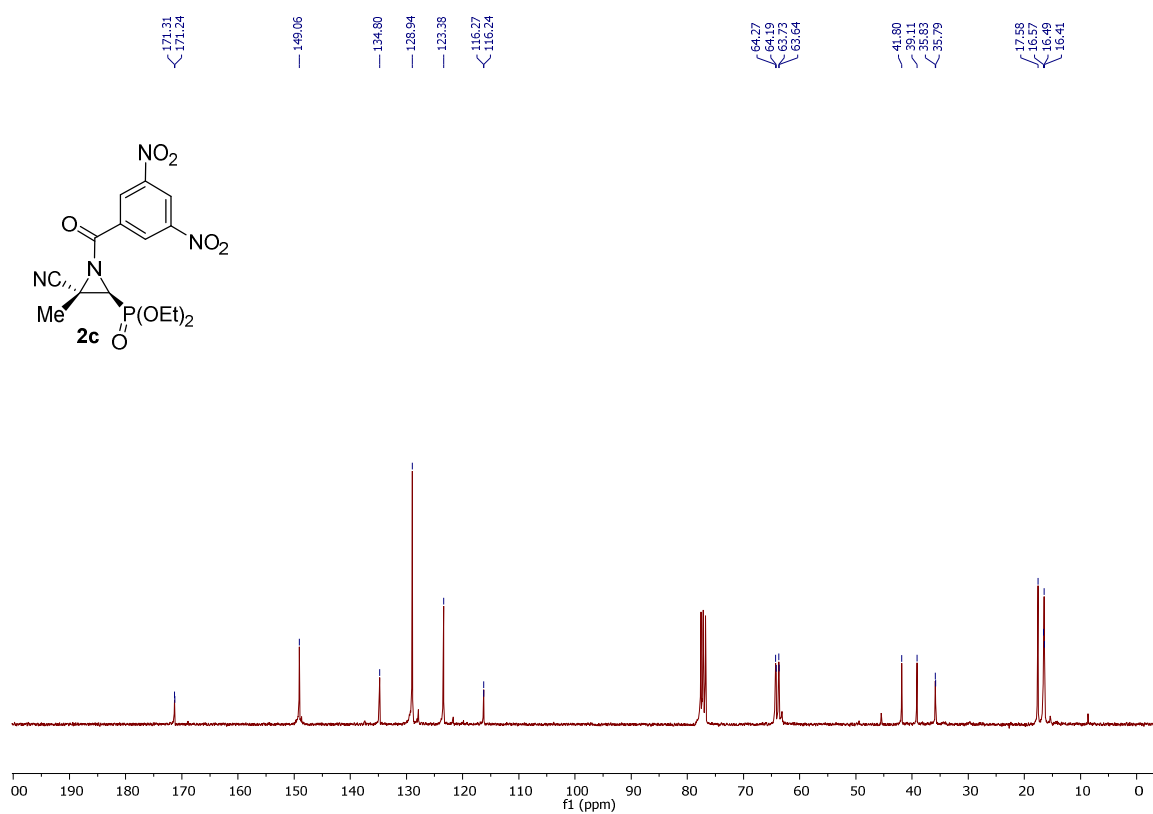

**Chemical structure of 3a:** CN1C(=O)C(c2cc([N+](=O)[O-])cc([N+](=O)[O-])c2)OC1P(=O)(c3ccccc3)c4ccccc4

**<sup>1</sup>H NMR spectrum (CDCl<sub>3</sub>):**

- Chemical shifts (ppm):** 9.20, 9.19, 9.18, 9.17, 9.16, 9.15, 9.14, 9.13, 9.12, 9.11, 9.10, 9.09, 9.08, 9.07, 9.06, 9.05, 9.04, 9.03, 9.02, 9.01, 9.00, 8.99, 8.98, 8.97, 8.96, 8.95, 8.94, 8.93, 8.92, 8.91, 8.90, 8.89, 8.88, 8.87, 8.86, 8.85, 8.84, 8.83, 8.82, 8.81, 8.80, 8.79, 8.78, 8.77, 8.76, 8.75, 8.74, 8.73, 8.72, 8.71, 8.70, 8.69, 8.68, 8.67, 8.66, 8.65, 8.64, 8.63, 8.62, 8.61, 8.60, 8.59, 8.58, 8.57, 8.56, 8.55, 8.54, 8.53, 8.52, 8.51, 8.50, 8.49, 8.48, 8.47, 8.46, 8.45, 8.44, 8.43, 8.42, 8.41, 8.40, 8.39, 8.38, 8.37, 8.36, 8.35, 8.34, 8.33, 8.32, 8.31, 8.30, 8.29, 8.28, 8.27, 8.26, 8.25, 8.24, 8.23, 8.22, 8.21, 8.20, 8.19, 8.18, 8.17, 8.16, 8.15, 8.14, 8.13, 8.12, 8.11, 8.10, 8.09, 8.08, 8.07, 8.06, 8.05, 8.04, 8.03, 8.02, 8.01, 8.00, 7.99, 7.98, 7.97, 7.96, 7.95, 7.94, 7.93, 7.92, 7.91, 7.90, 7.89, 7.88, 7.87, 7.86, 7.85, 7.84, 7.83, 7.82, 7.81, 7.80, 7.79, 7.78, 7.77, 7.76, 7.75, 7.74, 7.73, 7.72, 7.71, 7.70, 7.69, 7.68, 7.67, 7.66, 7.65, 7.64, 7.63, 7.62, 7.61, 7.60, 7.59, 7.58, 7.57, 7.56, 7.55, 7.54, 7.53, 7.52, 7.51, 7.50, 7.49, 7.48, 7.47, 7.46, 7.45, 7.44, 7.43, 7.42, 7.41, 7.40, 7.39, 7.38, 7.37, 7.36, 7.35, 7.34, 7.33, 7.32, 7.31, 7.30, 7.29, 7.28, 7.27, 7.26, 7.25, 7.24, 7.23, 7.22, 7.21, 7.20, 7.19, 7.18, 7.17, 7.16, 7.15, 7.14, 7.13, 7.12, 7.11, 7.10, 7.09, 7.08, 7.07, 7.06, 7.05, 7.04, 7.03, 7.02, 7.01, 7.00, 6.99, 6.98, 6.97, 6.96, 6.95, 6.94, 6.93, 6.92, 6.91, 6.90, 6.89, 6.88, 6.87, 6.86, 6.85, 6.84, 6.83, 6.82, 6.81, 6.80, 6.79, 6.78, 6.77, 6.76, 6.75, 6.74, 6.73, 6.72, 6.71, 6.70, 6.69, 6.68, 6.67, 6.66, 6.65, 6.64, 6.63, 6.62, 6.61, 6.60, 6.59, 6.58, 6.57, 6.56, 6.55, 6.54, 6.53, 6.52, 6.51, 6.50, 6.49, 6.48, 6.47, 6.46, 6.45, 6.44, 6.43, 6.42, 6.41, 6.40, 6.39, 6.38, 6.37, 6.36, 6.35, 6.34, 6.33, 6.32, 6.31, 6.30, 6.29, 6.28, 6.27, 6.26, 6.25, 6.24, 6.23, 6.22, 6.21, 6.20, 6.19, 6.18, 6.17, 6.16, 6.15, 6.14, 6.13, 6.12, 6.11, 6.10, 6.09, 6.08, 6.07, 6.06, 6.05, 6.04, 6.03, 6.02, 6.01, 6.00, 5.99, 5.98, 5.97, 5.96, 5.95, 5.94, 5.93, 5.92, 5.91, 5.90, 5.89, 5.88, 5.87, 5.86, 5.85, 5.84, 5.83, 5.82, 5.81, 5.80, 5.79, 5.78, 5.77, 5.76, 5.75, 5.74, 5.73, 5.72, 5.71, 5.70, 5.69, 5.68, 5.67, 5.66, 5.65, 5.64, 5.63, 5.62, 5.61, 5.60, 5.59, 5.58, 5.57, 5.56, 5.55, 5.54, 5.53, 5.52, 5.51, 5.50, 5.49, 5.48, 5.47, 5.46, 5.45, 5.44, 5.43, 5.42, 5.41, 5.40, 5.39, 5.38, 5.37, 5.36, 5.35, 5.34, 5.33, 5.32, 5.31, 5.30, 5.29, 5.28, 5.27, 5.26, 5.25, 5.24, 5.23, 5.22, 5.21, 5.20, 5.19, 5.18, 5.17, 5.16, 5.15, 5.14, 5.13, 5.12, 5.11, 5.10, 5.09, 5.08, 5.07, 5.06, 5.05, 5.04, 5.03, 5.02, 5.01, 5.00, 4.99, 4.98, 4.97, 4.96, 4.95, 4.94, 4.93, 4.92, 4.91, 4.90, 4.89, 4.88, 4.87, 4.86, 4.85, 4.84, 4.83, 4.82, 4.81, 4.80, 4.79, 4.78, 4.77, 4.76, 4.75, 4.74, 4.73, 4.72, 4.71, 4.70, 4.69, 4.68, 4.67, 4.66, 4.65, 4.64, 4.63, 4.62, 4.61, 4.60, 4.59, 4.58, 4.57, 4.56, 4.55, 4.54, 4.53, 4.52, 4.51, 4.50, 4.49, 4.48, 4.47, 4.46, 4.45, 4.44, 4.43, 4.42, 4.41, 4.40, 4.39, 4.38, 4.37, 4.36, 4.35, 4.34, 4.33, 4.32, 4.31, 4.30, 4.29, 4.28, 4.27, 4.26, 4.25, 4.24, 4.23, 4.22, 4.21, 4.20, 4.19, 4.18, 4.17, 4.16, 4.15, 4.14, 4.13, 4.12, 4.11, 4.10, 4.09, 4.08, 4.07, 4.06, 4.05, 4.04, 4.03, 4.02, 4.01, 4.00, 3.99, 3.98, 3.97, 3.96, 3.95, 3.94, 3.93, 3.92, 3.91, 3.90, 3.89, 3.88, 3.87, 3.86, 3.85, 3.84, 3.83, 3.82, 3.81, 3.80, 3.79, 3.78, 3.77, 3.76, 3.75, 3.74, 3.73, 3.72, 3.71, 3.70, 3.69, 3.68, 3.67, 3.66, 3.65, 3.64, 3.63, 3.62, 3.61, 3.60, 3.59, 3.58, 3.57, 3.56, 3.55, 3.54, 3.53, 3.52, 3.51, 3.50, 3.49, 3.48, 3.47, 3.46, 3.45, 3.44, 3.43, 3.42, 3.41, 3.40, 3.39, 3.38, 3.37, 3.36, 3.35, 3.34, 3.33, 3.32, 3.31, 3.30, 3.29, 3.28, 3.27, 3.26, 3.25, 3.24, 3.23, 3.22, 3.21, 3.20, 3.19, 3.18, 3.17, 3.16, 3.15, 3.14, 3.13, 3.12, 3.11, 3.10, 3.09, 3.08, 3.07, 3.06, 3.05, 3.04, 3.03, 3.02, 3.01, 3.00, 2.99, 2.98, 2.97, 2.96,

**3a**

C[C@H]1[C@@H](COP(=O)([O-])c2ccccc2)O[C@H](C(=O)c3cc([N+](=O)[O-])ccc3[N+](=O)[O-])N1C#N

161.7603  
161.6852  
148.7917  
138.8182  
133.7812  
133.3959  
133.3481  
132.8561  
131.2682  
131.1944  
131.0732  
128.8794  
128.7603  
128.6466  
128.5205  
128.3970  
122.2414  
119.8691  
119.7501  
108.0946  
83.6808  
82.6586  
68.2797  
68.2525  
23.0549  
22.9856

f1 (ppm)

$^1\text{H}$  NMR (400 MHz,  $\text{CDCl}_3$ ) of compound **5a**.

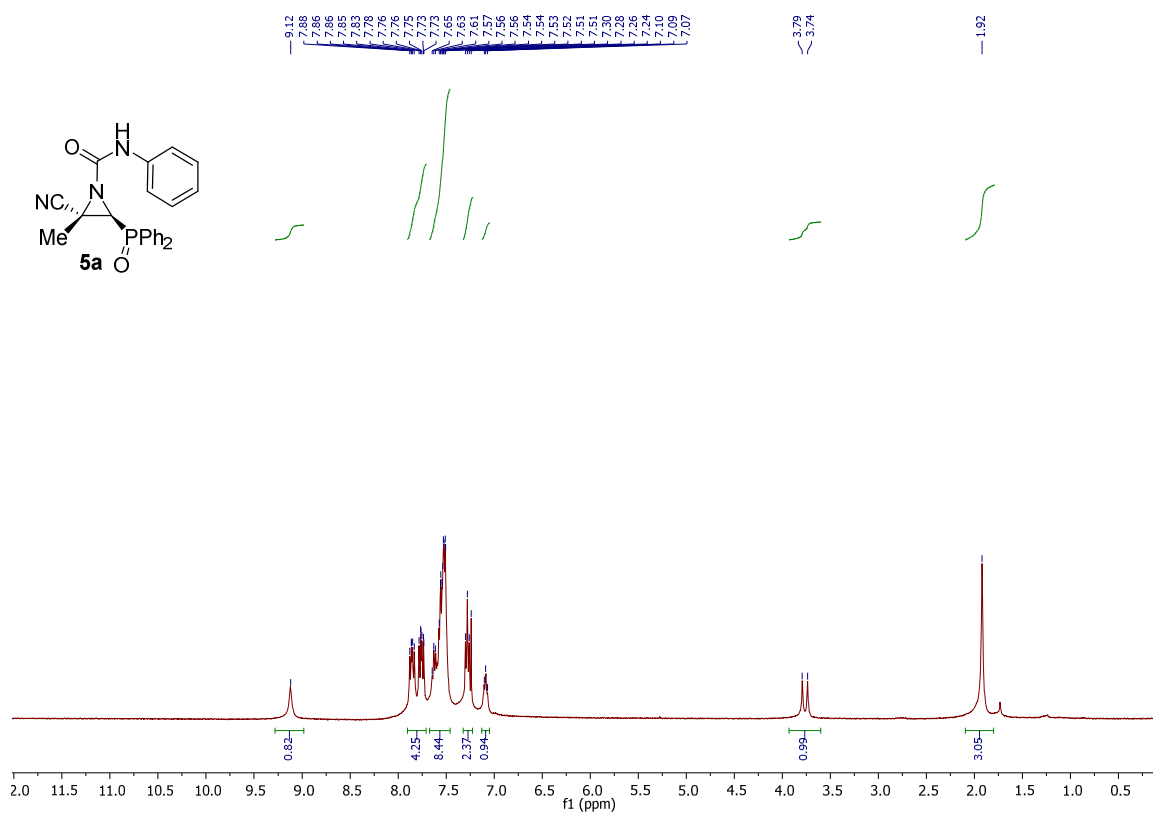

$^{13}\text{C}$  NMR (75 MHz,  $\text{CDCl}_3$ ) of compound **5a**.

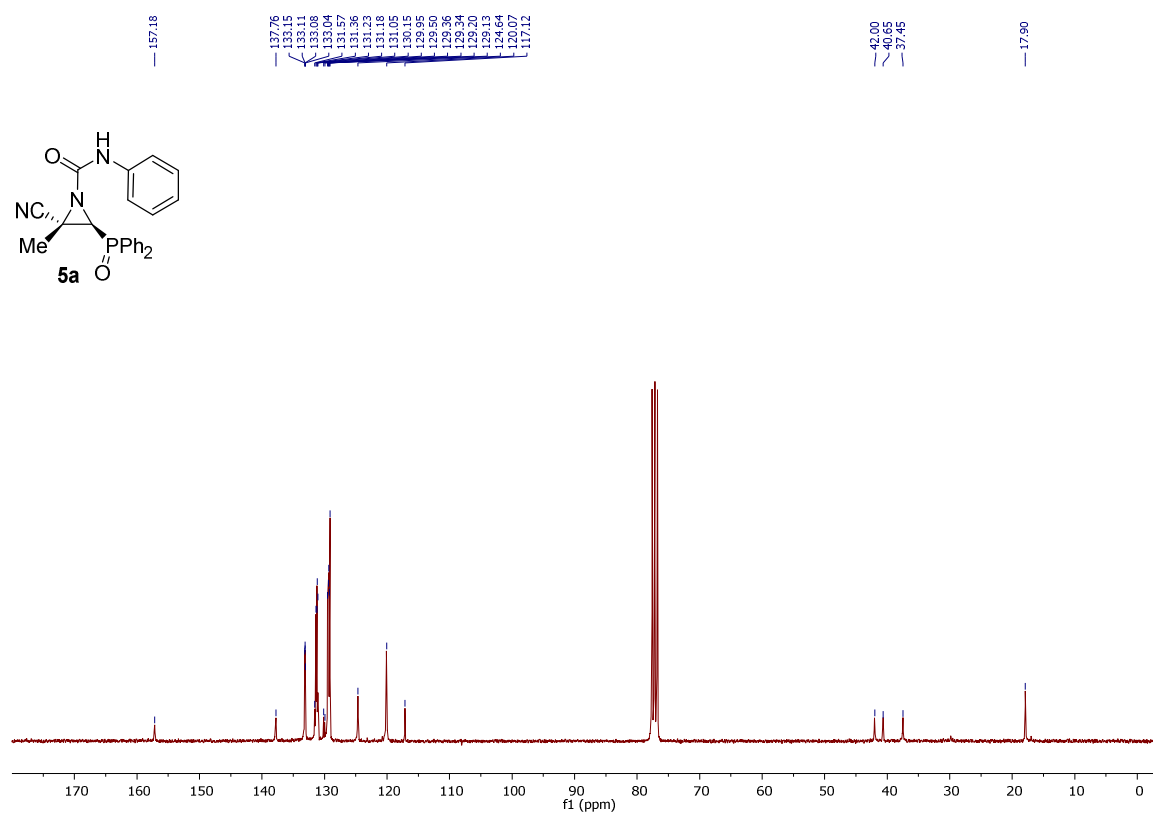

$^1\text{H}$  NMR (300 MHz,  $\text{CDCl}_3$ ) of compound **5b**.

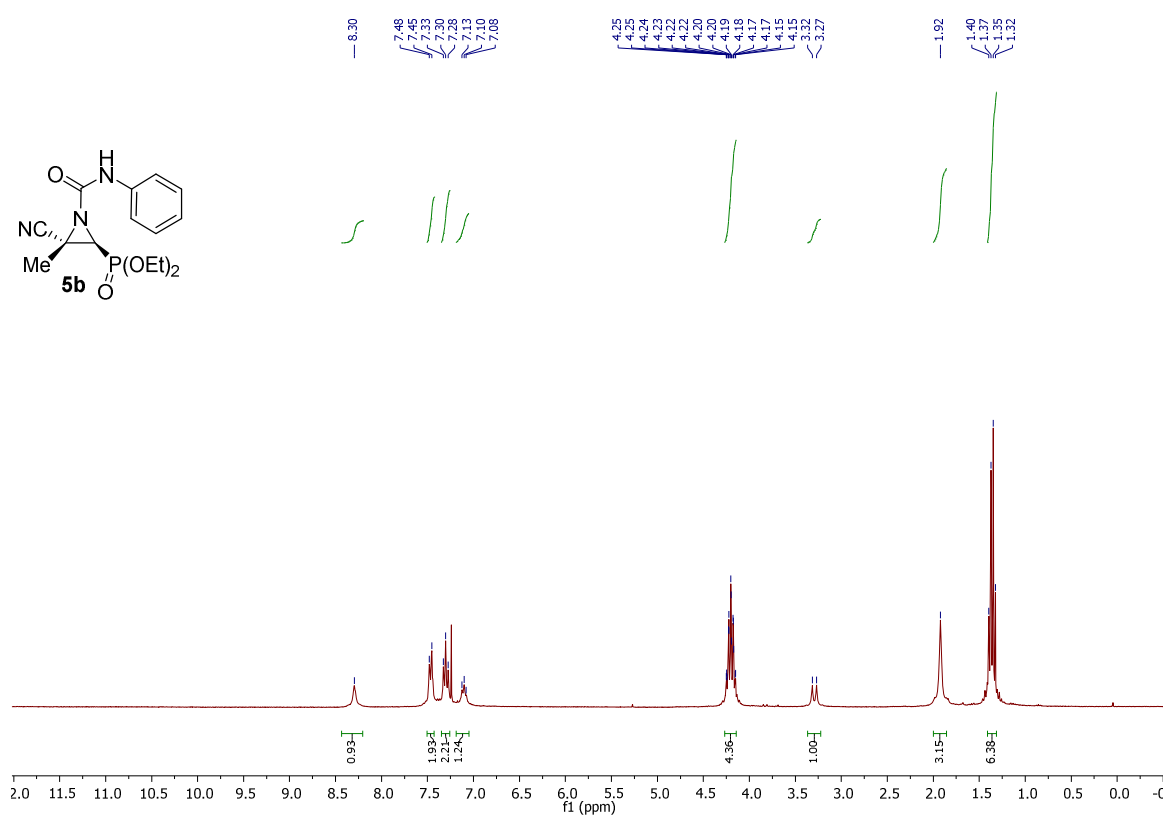

$^{13}\text{C}$   $\{^1\text{H}\}$  NMR (75 MHz,  $\text{CDCl}_3$ ) of compound **5b**.

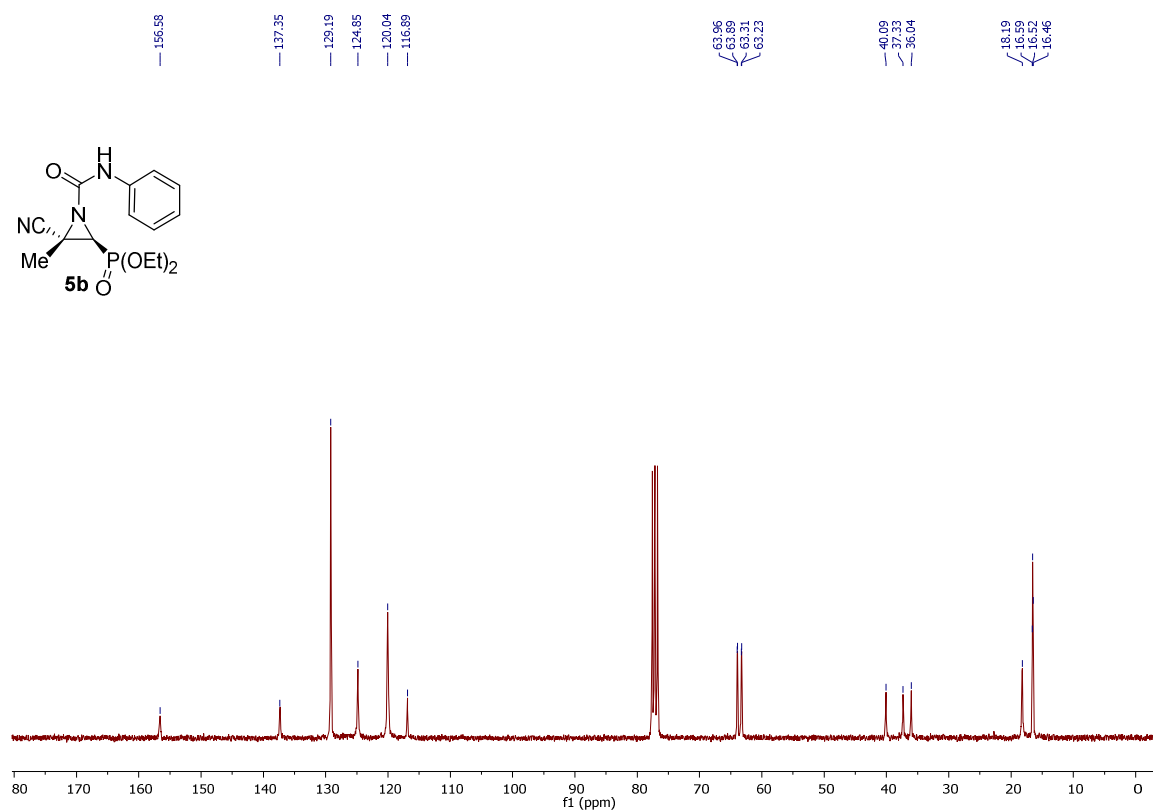

$^1\text{H}$  NMR (400 MHz,  $\text{CDCl}_3$ ) of compound **5c**.

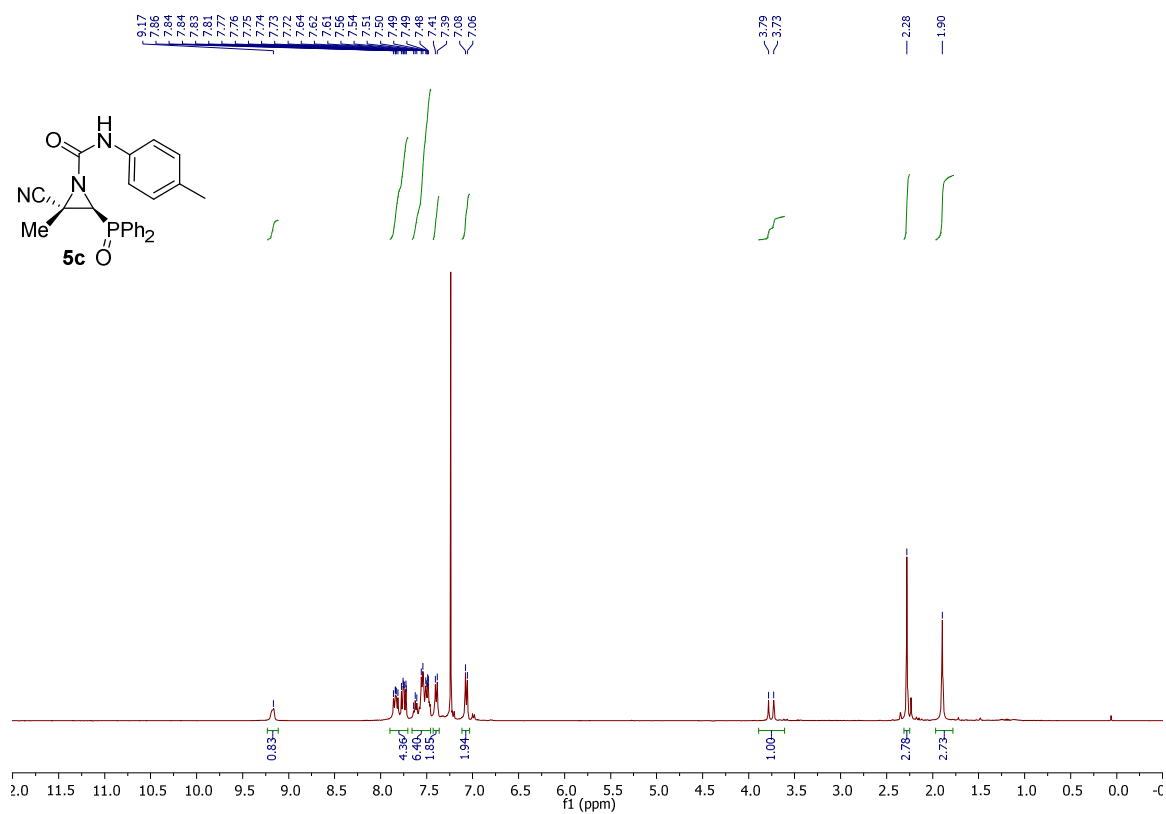

$^{13}\text{C}$  [ $^1\text{H}$ ] NMR (75 MHz,  $\text{CDCl}_3$ ) of compound **5c**.

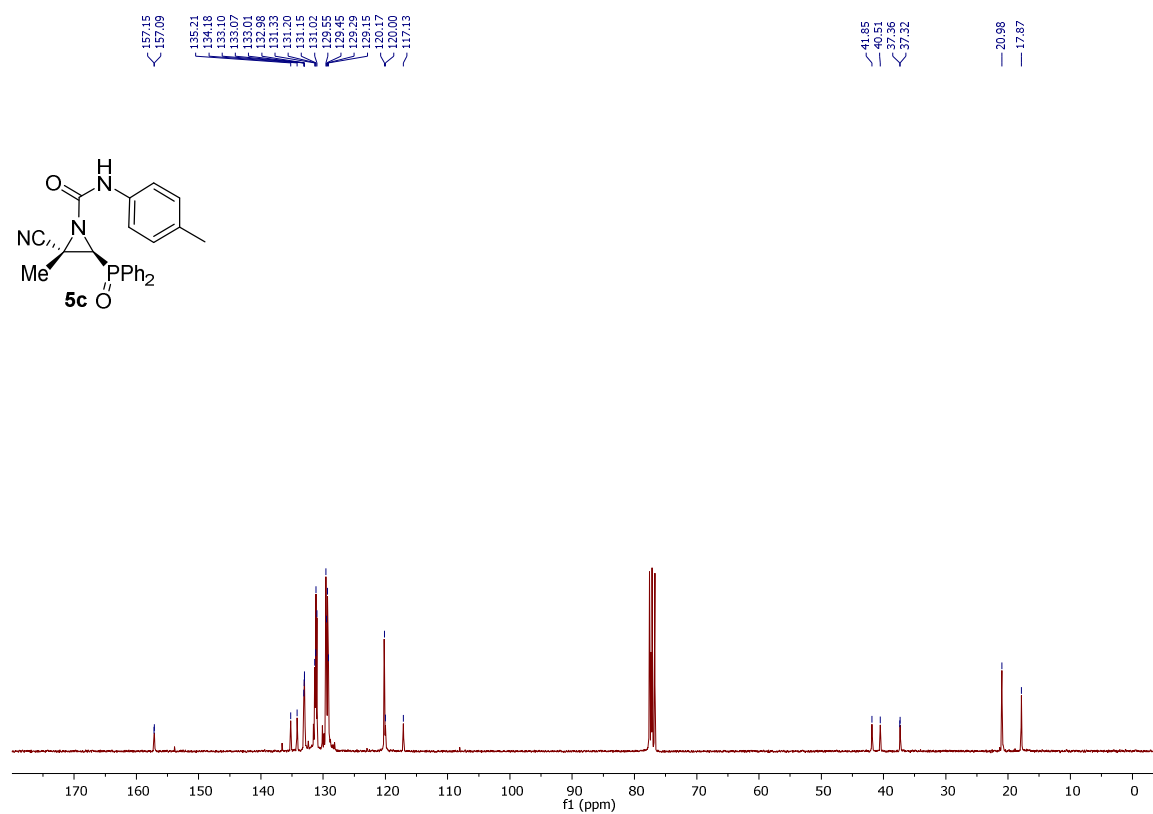



$^1\text{H}$  NMR (300 MHz,  $\text{CDCl}_3$ ) of compound **5d**.

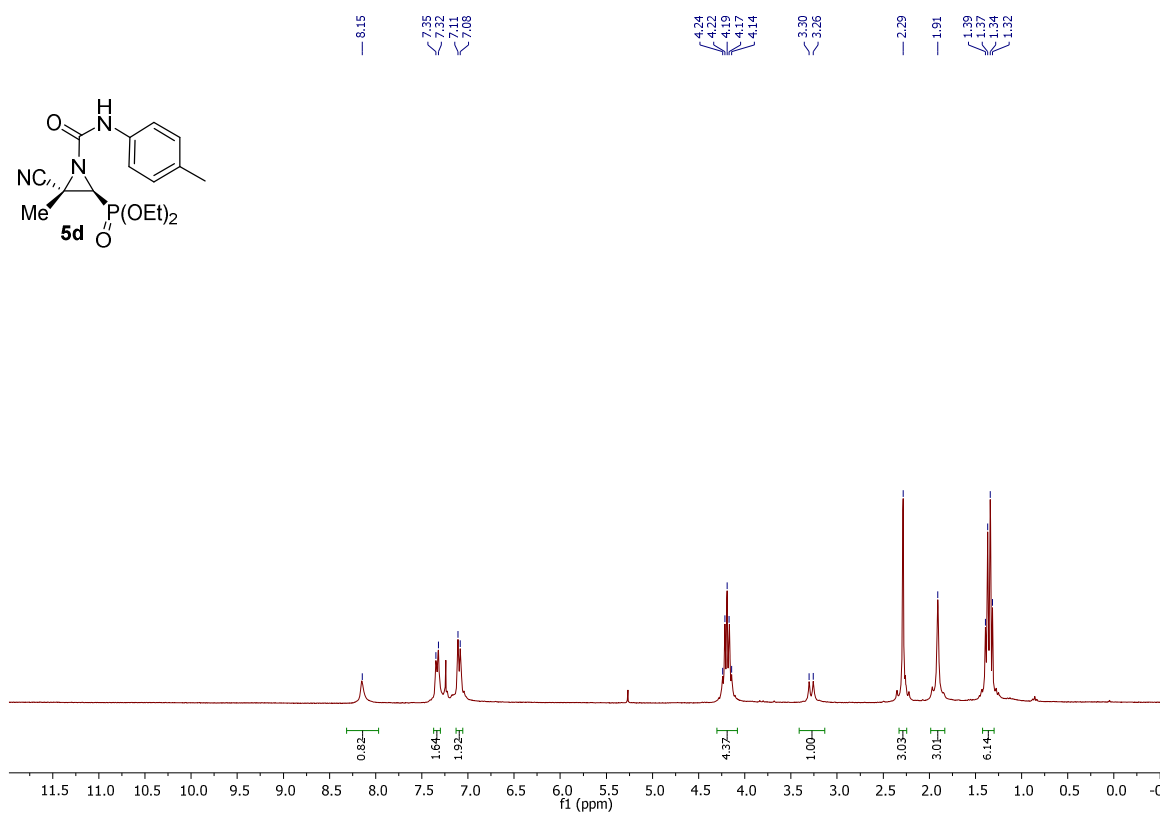

$^{13}\text{C}$  [ $^1\text{H}$ ] NMR (75 MHz,  $\text{CDCl}_3$ ) of compound **5d**.

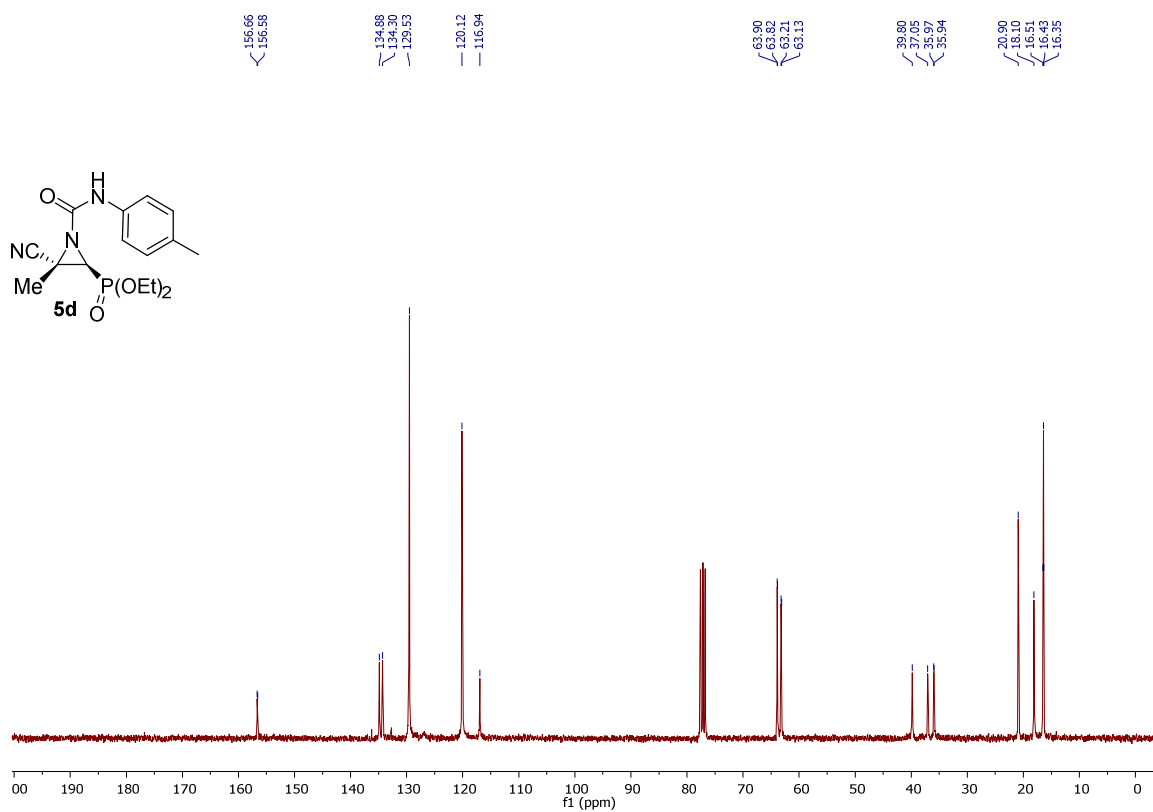

$^1\text{H}$  NMR (400 MHz, MeOD) of compound **5e**.

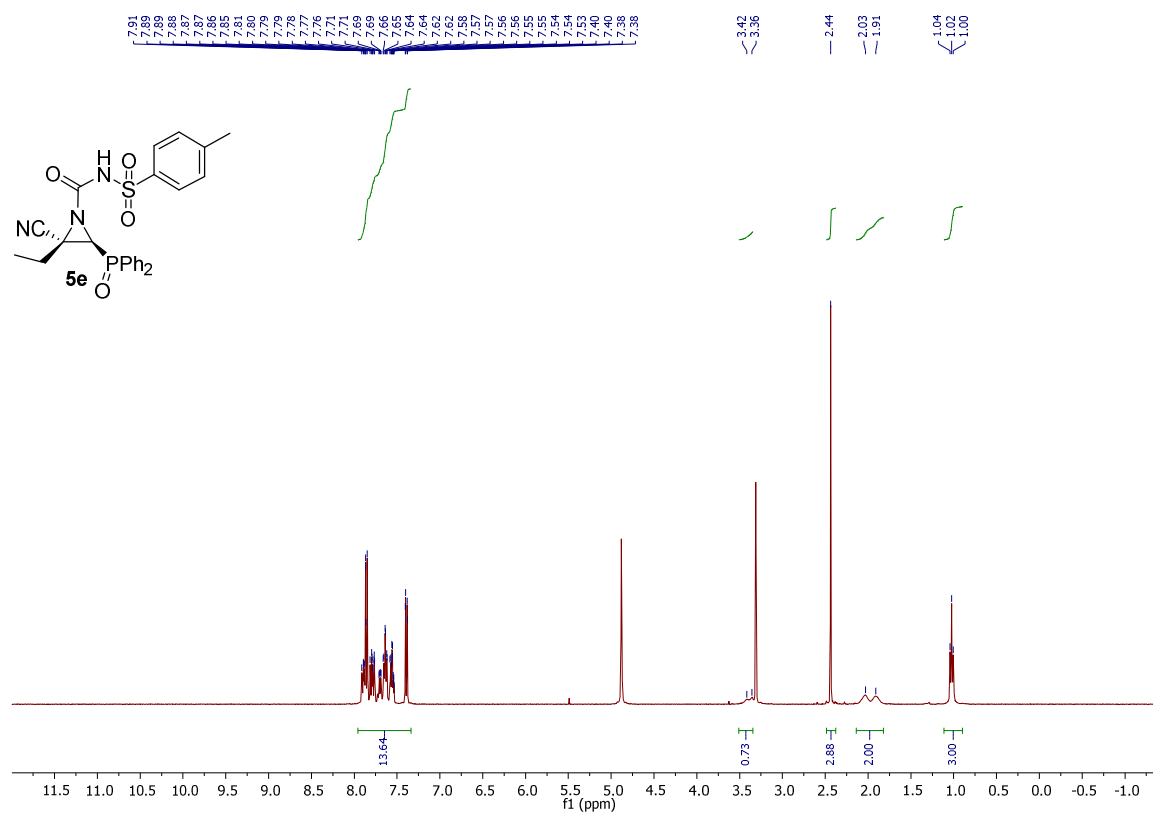

$^{13}\text{C}$   $\{^1\text{H}\}$  NMR (75 MHz, MeOD) of compound **5e**.

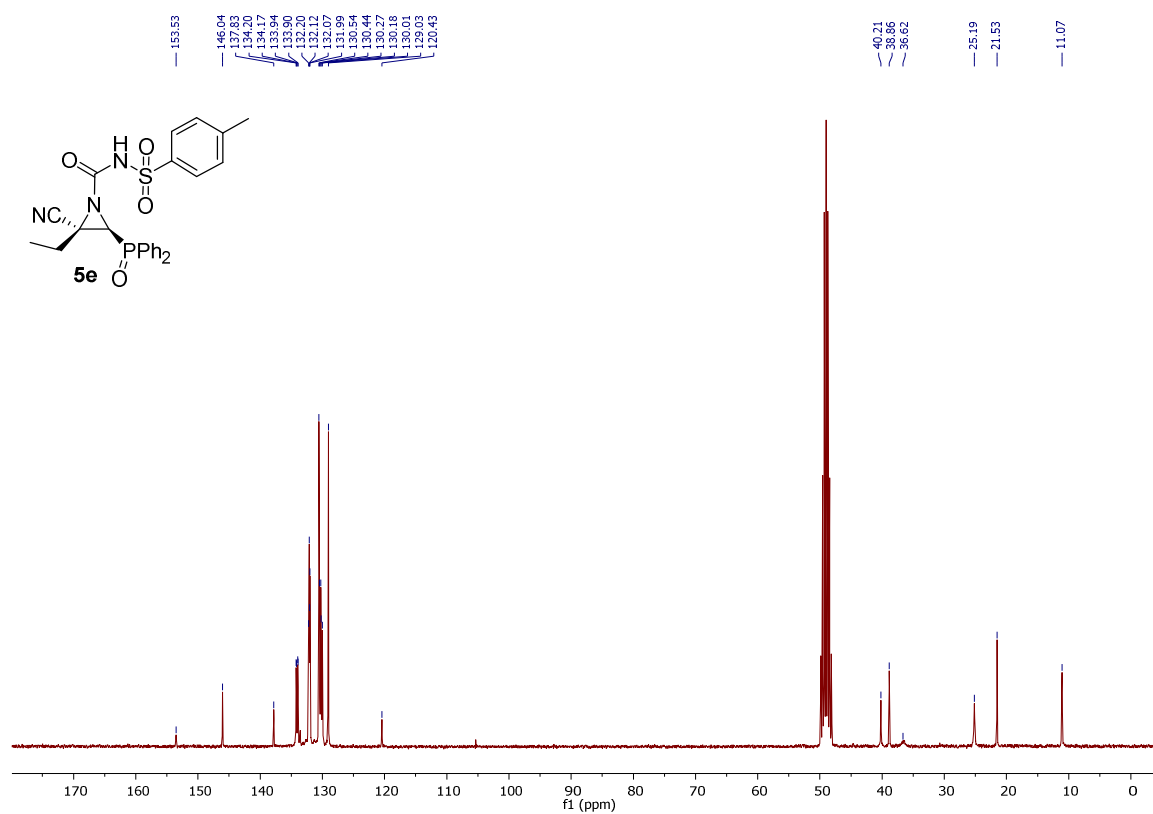

$^1\text{H}$  NMR (300 MHz,  $\text{CDCl}_3$ ) of compound **5f**.

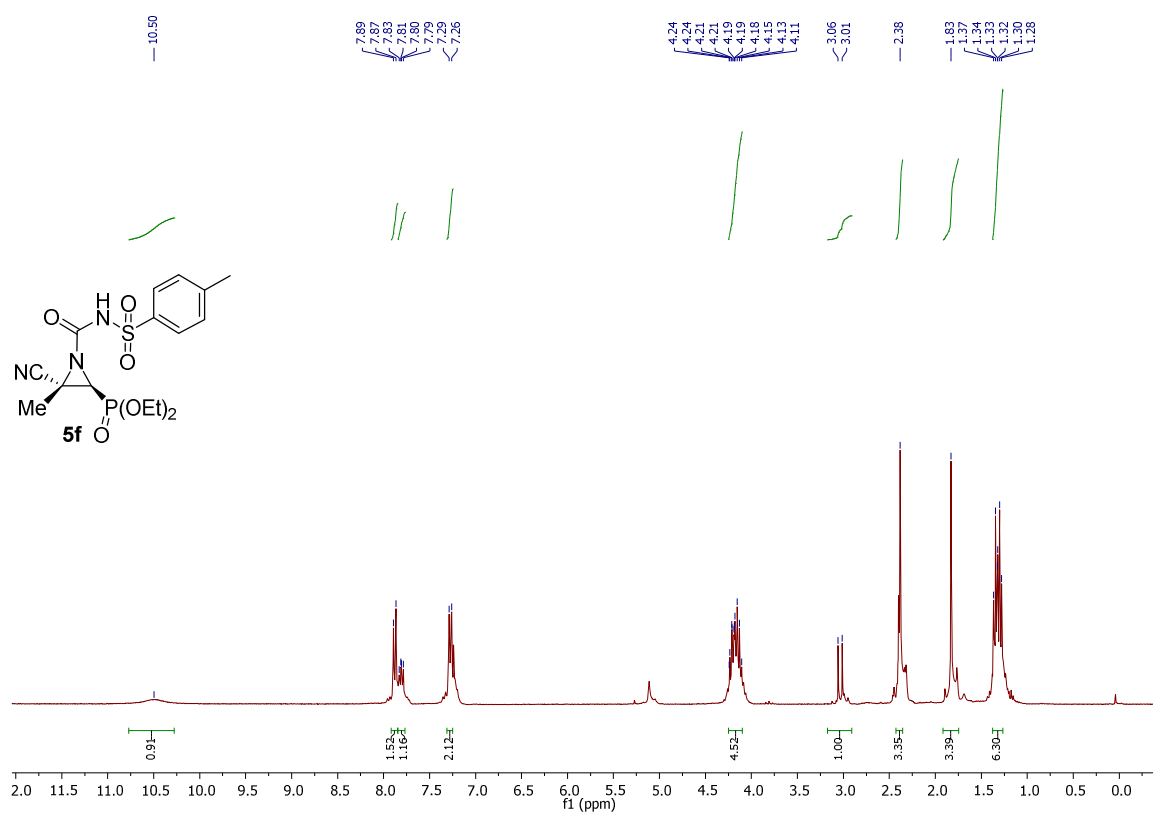

$^{13}\text{C}$  [ $^1\text{H}$ ] NMR (75 MHz,  $\text{CDCl}_3$ ) of compound **5f**.

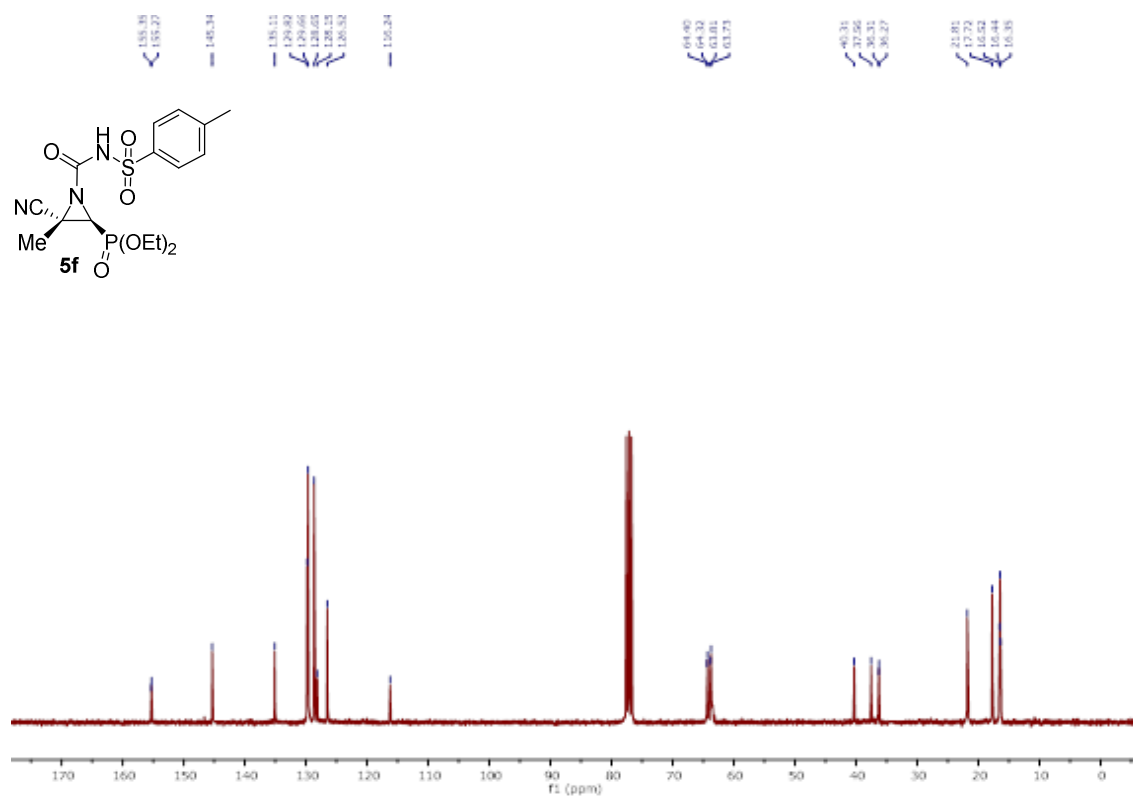

CCNC(=O)N1C(C#N)C1(C)P(=O)(O)P(c1ccccc1)c2ccccc2

**5g**

<sup>1</sup>H NMR spectrum (CDCl<sub>3</sub>) of compound **5g**. The spectrum shows peaks at 1.13 ppm (triplet, 3H, integration 3.00), 1.15 ppm (triplet, 3H, integration 3.00), 2.00 ppm (singlet, 1H, integration 0.95), 3.37 ppm (doublet, 2H, integration 2.11), 3.57 ppm (doublet, 2H, integration 1.00), 7.46 ppm (triplet, 3H, integration 6.00), 7.53 ppm (triplet, 3H, integration 6.00), and 7.58 ppm (triplet, 3H, integration 4.00).

CCNC(=O)N1[C@H](C)C(=O)P1(c2ccccc2)c3ccccc3

Chemical structure of **5g** (N-ethyl-1-methyl-2-oxo-2-phenylphosphorinane-1-carboxamide) is shown. The structure features a five-membered ring containing a phosphorus atom double-bonded to an oxygen atom and single-bonded to a methyl group, a carbonyl group, and a nitrogen atom substituted with an ethyl group. A phenyl group is attached to the phosphorus atom.

The <sup>13</sup>C NMR spectrum (CDCl<sub>3</sub>) shows the following chemical shifts (ppm): 159.11, 158.14, 132.97, 132.96, 132.95, 132.94, 132.93, 132.92, 132.91, 132.90, 132.89, 132.88, 132.87, 132.86, 132.85, 132.84, 132.83, 132.82, 132.81, 132.80, 132.79, 132.78, 132.77, 132.76, 132.75, 132.74, 132.73, 132.72, 132.71, 132.70, 132.69, 132.68, 132.67, 132.66, 132.65, 132.64, 132.63, 132.62, 132.61, 132.60, 132.59, 132.58, 132.57, 132.56, 132.55, 132.54, 132.53, 132.52, 132.51, 132.50, 132.49, 132.48, 132.47, 132.46, 132.45, 132.44, 132.43, 132.42, 132.41, 132.40, 132.39, 132.38, 132.37, 132.36, 132.35, 132.34, 132.33, 132.32, 132.31, 132.30, 132.29, 132.28, 132.27, 132.26, 132.25, 132.24, 132.23, 132.22, 132.21, 132.20, 132.19, 132.18, 132.17, 132.16, 132.15, 132.14, 132.13, 132.12, 132.11, 132.10, 132.09, 132.08, 132.07, 132.06, 132.05, 132.04, 132.03, 132.02, 132.01, 132.00, 131.99, 131.98, 131.97, 131.96, 131.95, 131.94, 131.93, 131.92, 131.91, 131.90, 131.89, 131.88, 131.87, 131.86, 131.85, 131.84, 131.83, 131.82, 131.81, 131.80, 131.79, 131.78, 131.77, 131.76, 131.75, 131.74, 131.73, 131.72, 131.71, 131.70, 131.69, 131.68, 131.67, 131.66, 131.65, 131.64, 131.63, 131.62, 131.61, 131.60, 131.59, 131.58, 131.57, 131.56, 131.55, 131.54, 131.53, 131.52, 131.51, 131.50, 131.49, 131.48, 131.47, 131.46, 131.45, 131.44, 131.43, 131.42, 131.41, 131.40, 131.39, 131.38, 131.37, 131.36, 131.35, 131.34, 131.33, 131.32, 131.31, 131.30, 131.29, 131.28, 131.27, 131.26, 131.25, 131.24, 131.23, 131.22, 131.21, 131.20, 131.19, 131.18, 131.17, 131.16, 131.15, 131.14, 131.13, 131.12, 131.11, 131.10, 131.09, 131.08, 131.07, 131.06, 131.05, 131.04, 131.03, 131.02, 131.01, 131.00, 130.99, 130.98, 130.97, 130.96, 130.95, 130.94, 130.93, 130.92, 130.91, 130.90, 130.89, 130.88, 130.87, 130.86, 130.85, 130.84, 130.83, 130.82, 130.81, 130.80, 130.79, 130.78, 130.77, 130.76, 130.75, 130.74, 130.73, 130.72, 130.71, 130.70, 130.69, 130.68, 130.67, 130.66, 130.65, 130.64, 130.63, 130.62, 130.61, 130.60, 130.59, 130.58, 130.57, 130.56, 130.55, 130.54, 130.53, 130.52, 130.51, 130.50, 130.49, 130.48, 130.47, 130.46, 130.45, 130.44, 130.43, 130.42, 130.41, 130.40, 130.39, 130.38, 130.37, 130.36, 130.35, 130.34, 130.33, 130.32, 130.31, 130.30, 130.29, 130.28, 130.27, 130.26, 130.25, 130.24, 130.23, 130.22, 130.21, 130.20, 130.19, 130.18, 130.17, 130.16, 130.15, 130.14, 130.13, 130.12, 130.11, 130.10, 130.09, 130.08, 130.07, 130.06, 130.05, 130.04, 130.03, 130.02, 130.01, 130.00, 129.99, 129.98, 129.97, 129.96, 129.95, 129.94, 129.93, 129.92, 129.91, 129.90, 129.89, 129.88, 129.87, 129.86, 129.85, 129.84, 129.83, 129.82, 129.81, 129.80, 129.79, 129.78, 129.77, 129.76, 129.75, 129.74, 129.73, 129.72, 129.71, 129.70, 129.69, 129.68, 129.67, 129.66, 129.65, 129.64, 129.63, 129.62, 129.61, 129.60, 129.59, 129.58, 129.57, 129.56, 129.55, 129.54, 129.53, 129.52, 129.51, 129.50, 129.49, 129.48, 129.47, 129.46, 129.45, 129.44, 129.43, 129.42, 129.41, 129.40, 129.39, 129.38, 129.37, 129.36, 129.35, 129.34, 129.33, 129.32, 129.31, 129.30, 129.29, 129.28, 129.27, 129.26, 129.25, 129.24, 129.23, 129.22, 129.21, 129.20, 129.19, 129.18, 129.17, 129.16, 129.15, 129.14, 129.13, 129.12, 129.11, 129.10, 129.09, 129.08, 129.07, 129.06, 129.05, 129.04, 129.03, 129.02, 129.01, 129.00, 128.99, 128.98, 128.97, 128.96, 128.95, 128.94, 128.93, 128.92, 128.91, 128.90, 128.89, 128.88, 128.87, 128.86, 128.85, 128.84, 128.83, 128.82, 128.81, 128.80, 128.79, 128.78, 128.77, 128.76, 128.75, 128.74, 128.73, 128.72, 128.71, 128.70, 128.69, 128.68, 128.67, 128.66, 128.65, 128.64, 128.63, 128.62, 128.61, 128.60, 128.59, 128.58, 128.57, 128.56, 128.55, 128.54, 128.53, 128.52, 128.51, 128.50, 128.49, 128.48, 128.47, 128.46, 128.45, 128.44, 128.43, 128.42, 128.41, 128.40, 128.39, 128.38, 128.37, 128.36, 128.35, 128.34, 128.33, 128.32, 128.31, 128.30, 128.29, 128.28, 128.27, 128.26, 128.25, 128.24, 128.23, 128.22, 128.21, 128.20, 128.19, 128.18, 128.17, 128.16, 128.15, 128.14, 128.13, 128.12, 128.11, 128.

$^1\text{H}$  NMR (300 MHz,  $\text{CDCl}_3$ ) of compound **5h**.

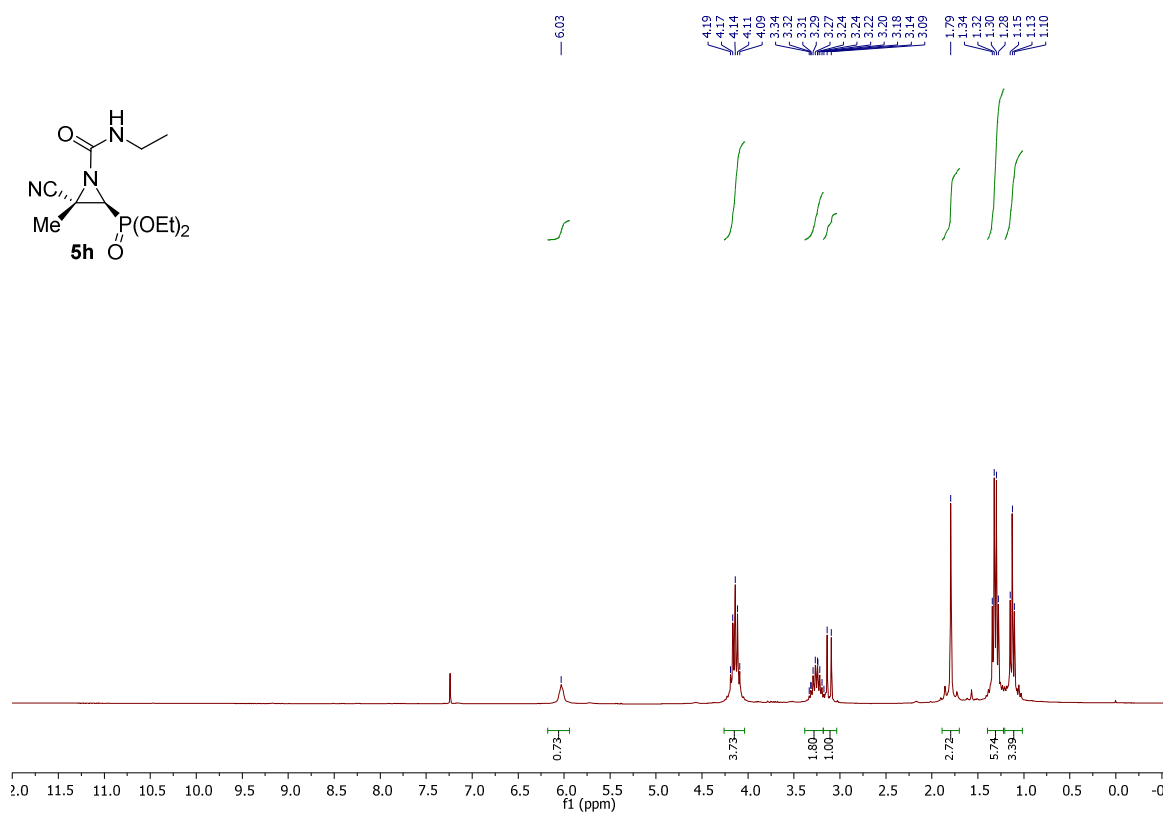

$^{13}\text{C}$  [ $^1\text{H}$ ] NMR (75 MHz,  $\text{CDCl}_3$ ) of compound **5h**.

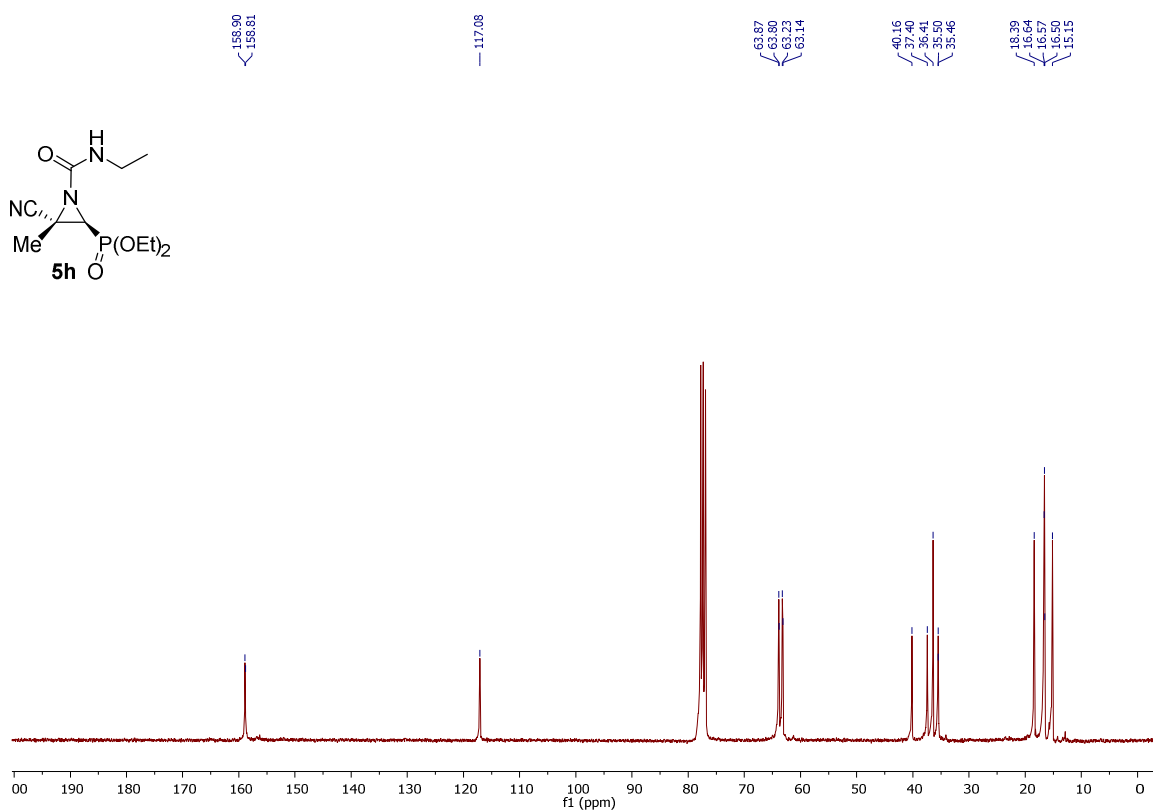

$^1\text{H}$  NMR (400 MHz,  $\text{CDCl}_3$ ) of compound **5i**.

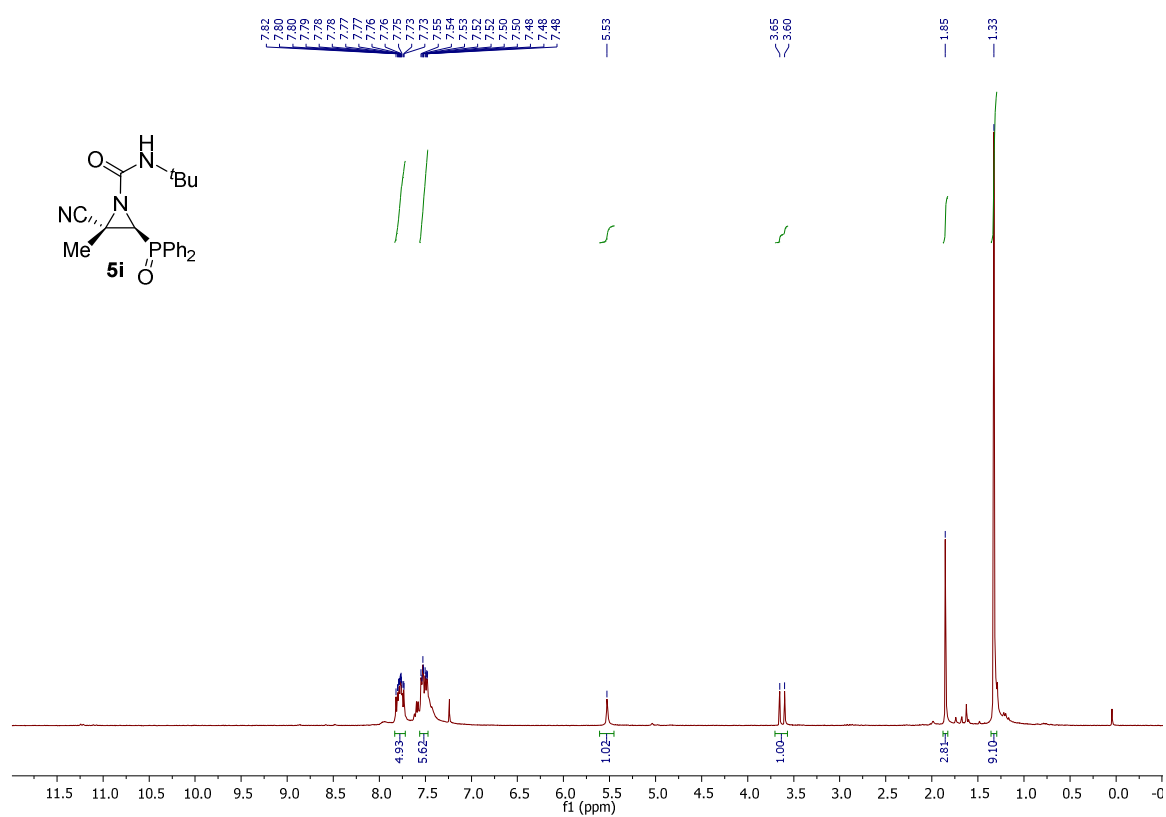

$^{13}\text{C}$   $\{^1\text{H}\}$  NMR (75 MHz,  $\text{CDCl}_3$ ) of compound **5i**.

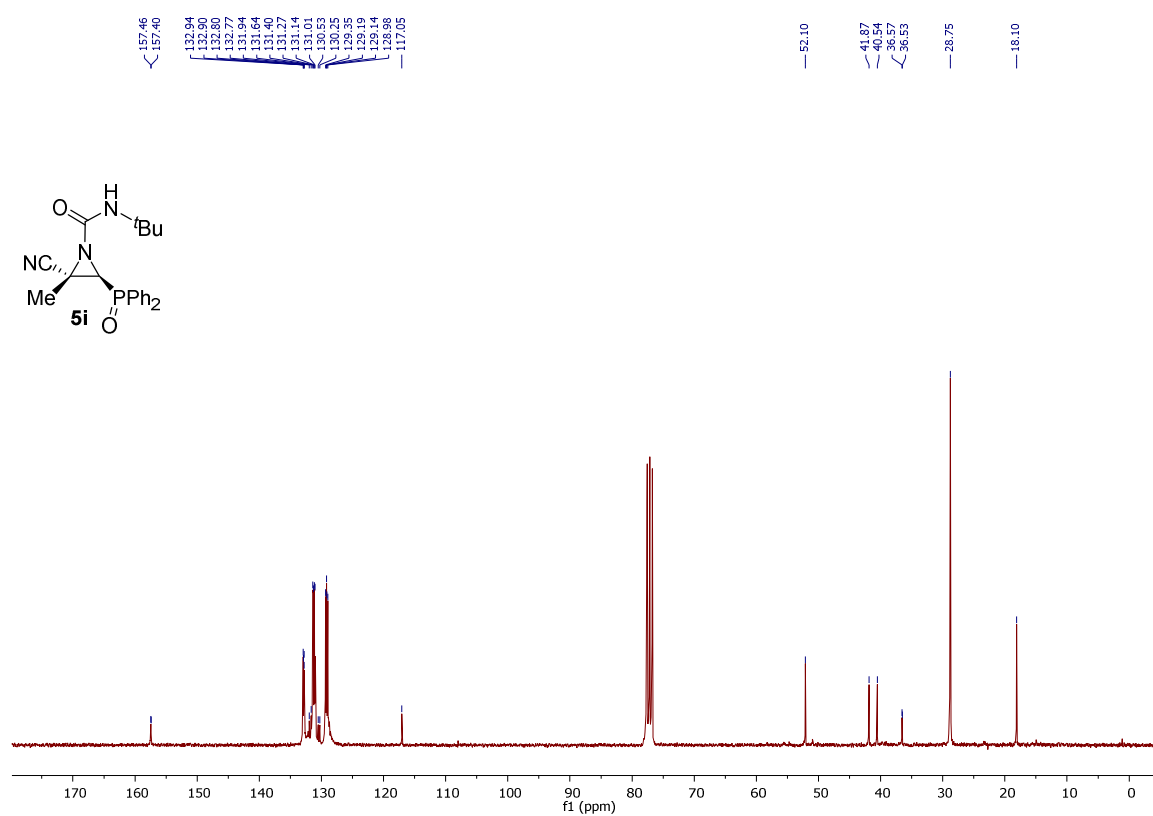

**Figure S10.** <sup>1</sup>H NMR spectrum of compound **5j** in CDCl<sub>3</sub>. The chemical structure of **5j** is shown in the inset. The spectrum displays peaks corresponding to the structure, with integration values and chemical shifts (ppm) indicated above the peaks.

**Chemical structure of 5j:** CC1(C)N(C(=O)N(C)C)C(=O)P1(=O)OCC

**Peak Data:**

| Chemical Shift (ppm)   | Integration |
|------------------------|-------------|
| 7.25                   | 1.04        |
| 5.45                   | 1.04        |
| 4.21, 4.18, 4.13, 4.11 | 4.26        |
| 3.16, 3.11             | 1.00        |
| 1.81                   | 3.35        |
| 1.36, 1.33, 1.32, 1.30 | 14.98       |

Chemical structure of **5j** is shown above the spectrum. The spectrum displays peaks corresponding to the structure, with chemical shifts (ppm) labeled above the peaks:

- 157.13, 157.04 (Carbonyl carbons)
- 116.90, 116.87 (N-alkene carbons)
- 63.71, 63.63, 63.04, 62.95 (Methoxy carbons)
- 52.07 (Methoxy carbon)
- 39.66, 36.90, 35.37, 35.32 (Methyl carbons)
- 28.75 (Methyl carbon)
- 18.40, 16.56, 16.48, 16.41 (Methyl carbons)

CC(C)(C)NC(=O)N1[C@H](C#N)[C@@H](C)P1(=O)OCC

$^1\text{H}$  NMR (400 MHz,  $\text{CDCl}_3$ ) of compound **5k**.

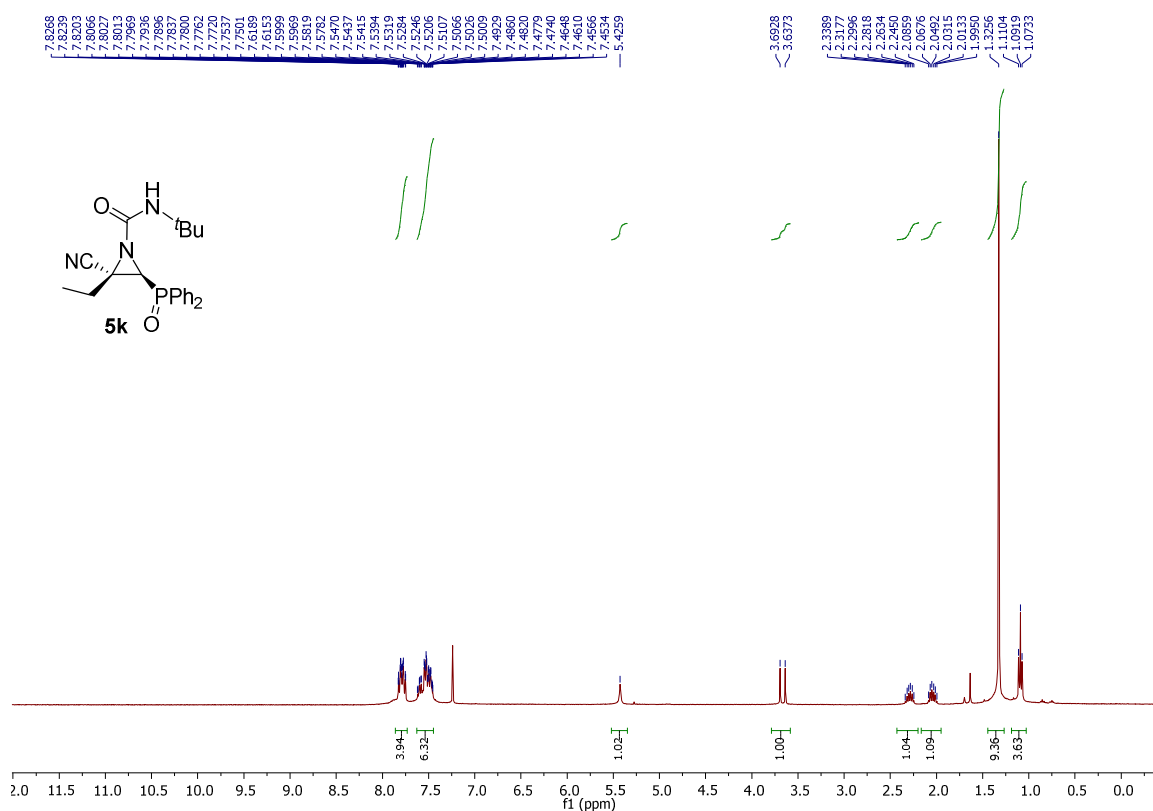

$^{13}\text{C}$  [ $^1\text{H}$ ] NMR (100 MHz,  $\text{CDCl}_3$ ) of compound **5k**.

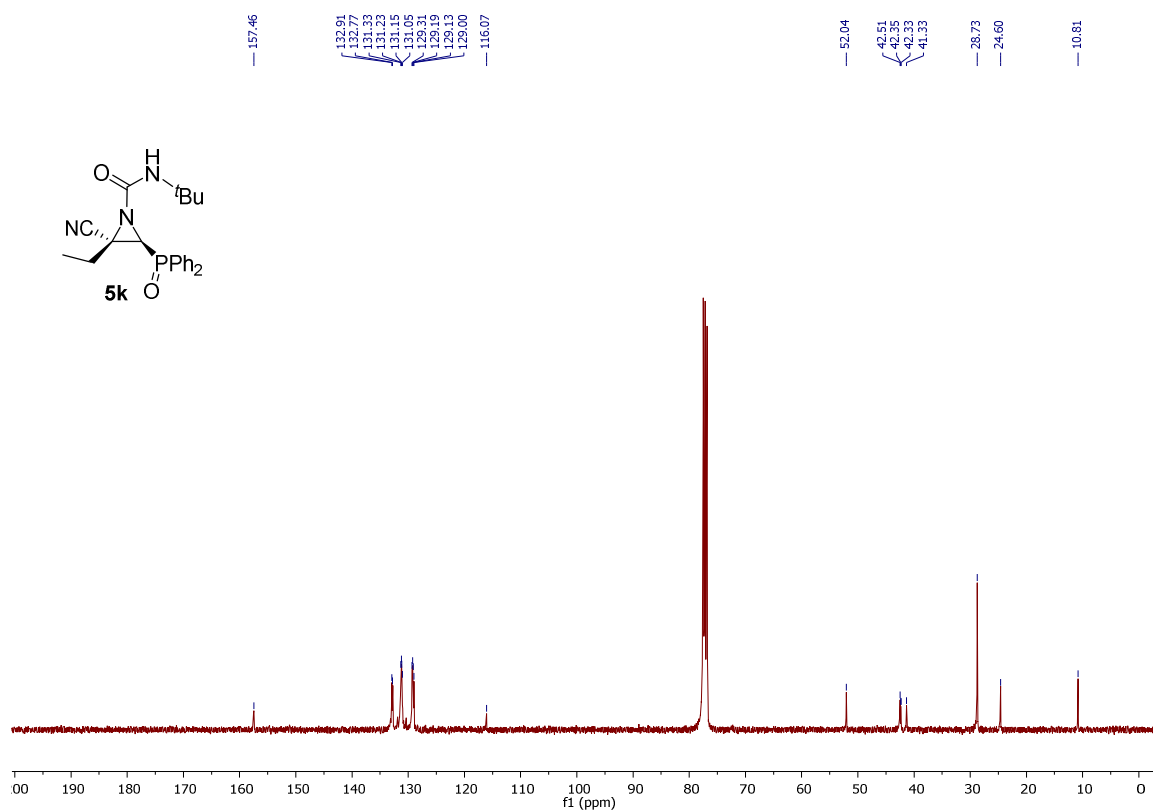



$^1\text{H}$  NMR (400 MHz,  $\text{CDCl}_3$ ) of compound **6a**.

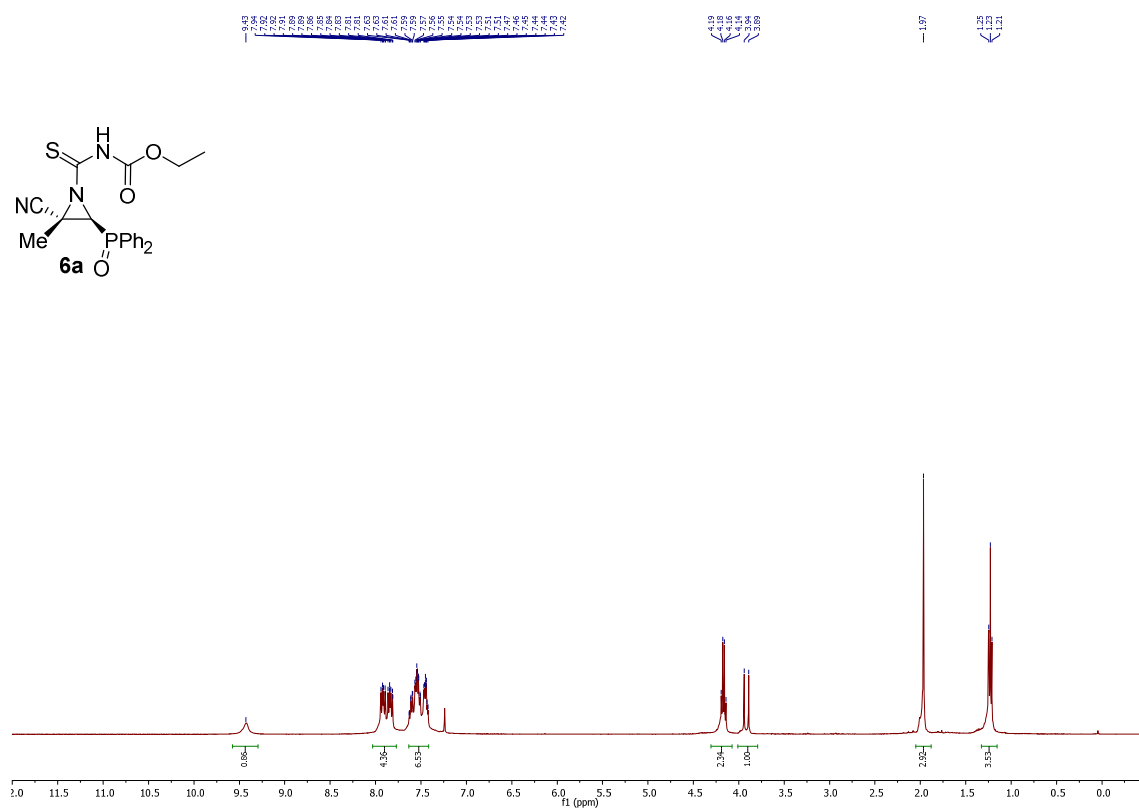

$^{13}\text{C}$   $\{^1\text{H}\}$  NMR (75 MHz,  $\text{CDCl}_3$ ) of compound **6a**.

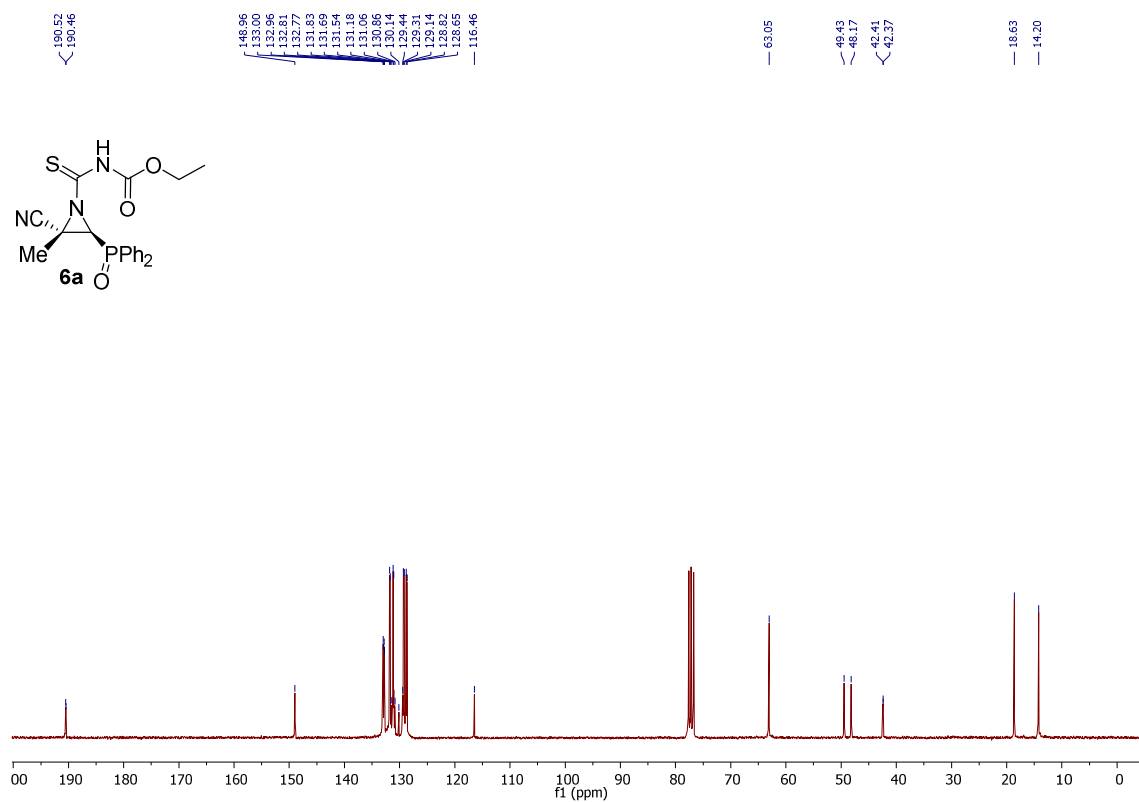

$^1\text{H}$  NMR (400 MHz,  $\text{CDCl}_3$ ) of compound **6b**.

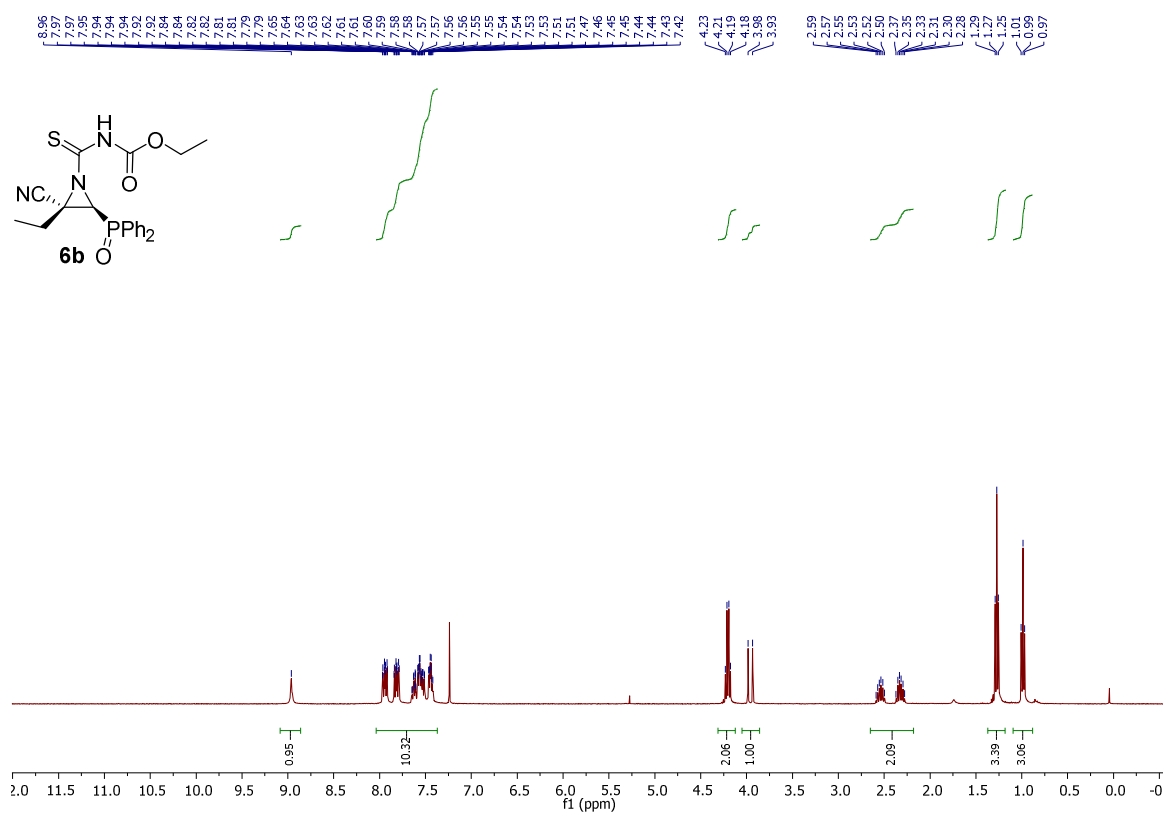

$^{13}\text{C}$  [ $^1\text{H}$ ] NMR (75 MHz,  $\text{CDCl}_3$ ) of compound **6b**.

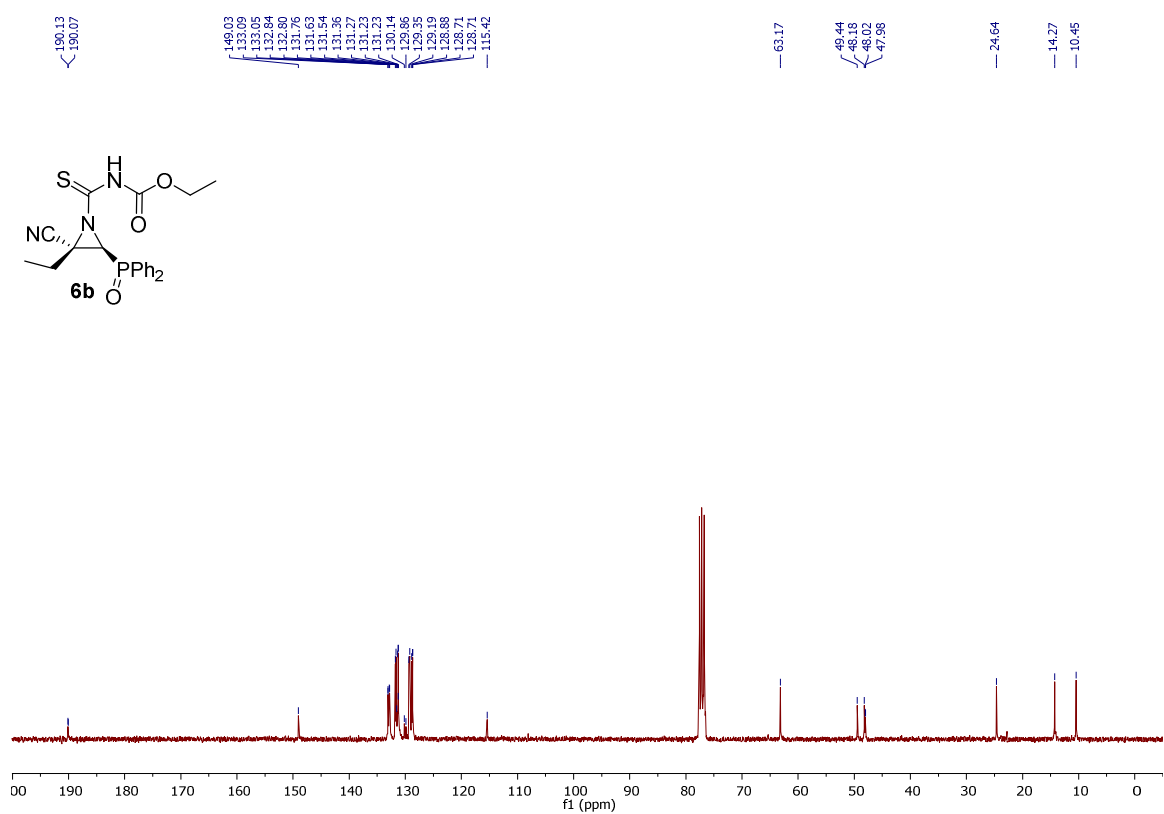

$^1\text{H}$  NMR (300 MHz,  $\text{CDCl}_3$ ) of compound **6c**.

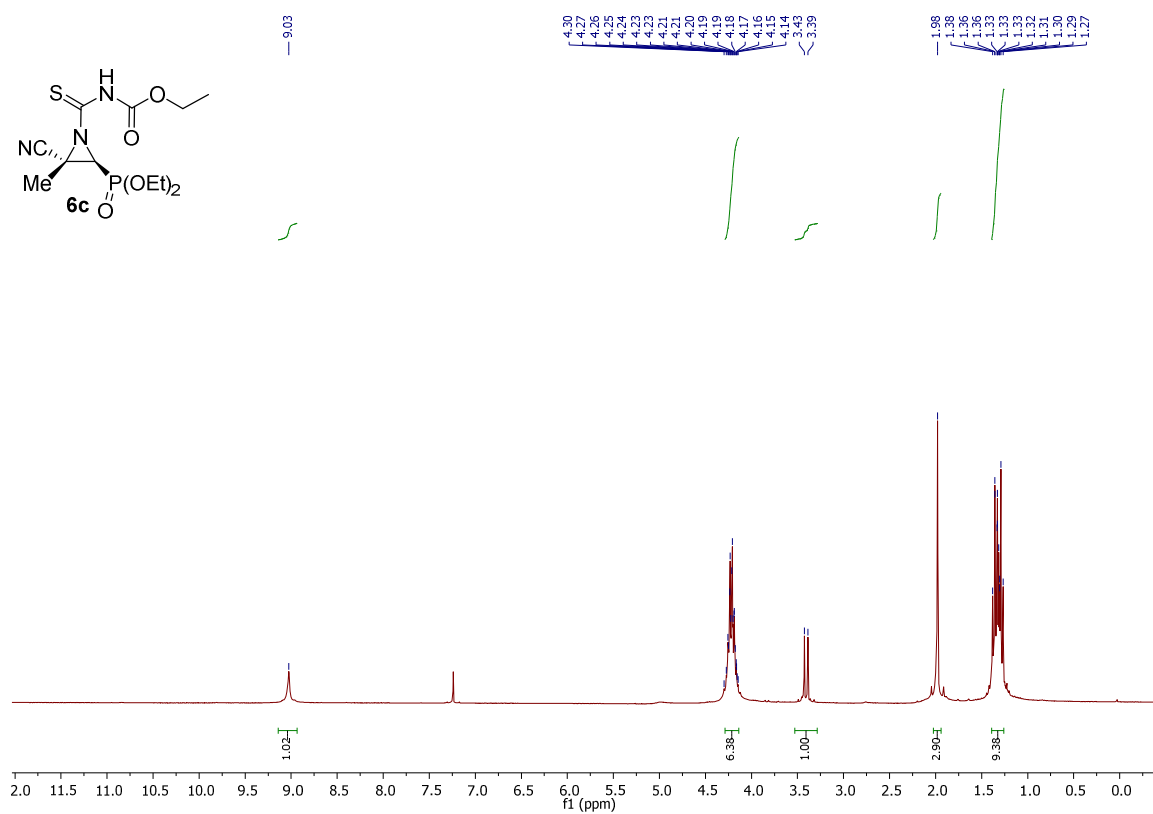

$^{13}\text{C}$  [ $^1\text{H}$ ] NMR (75 MHz,  $\text{CDCl}_3$ ) of compound **6c**.

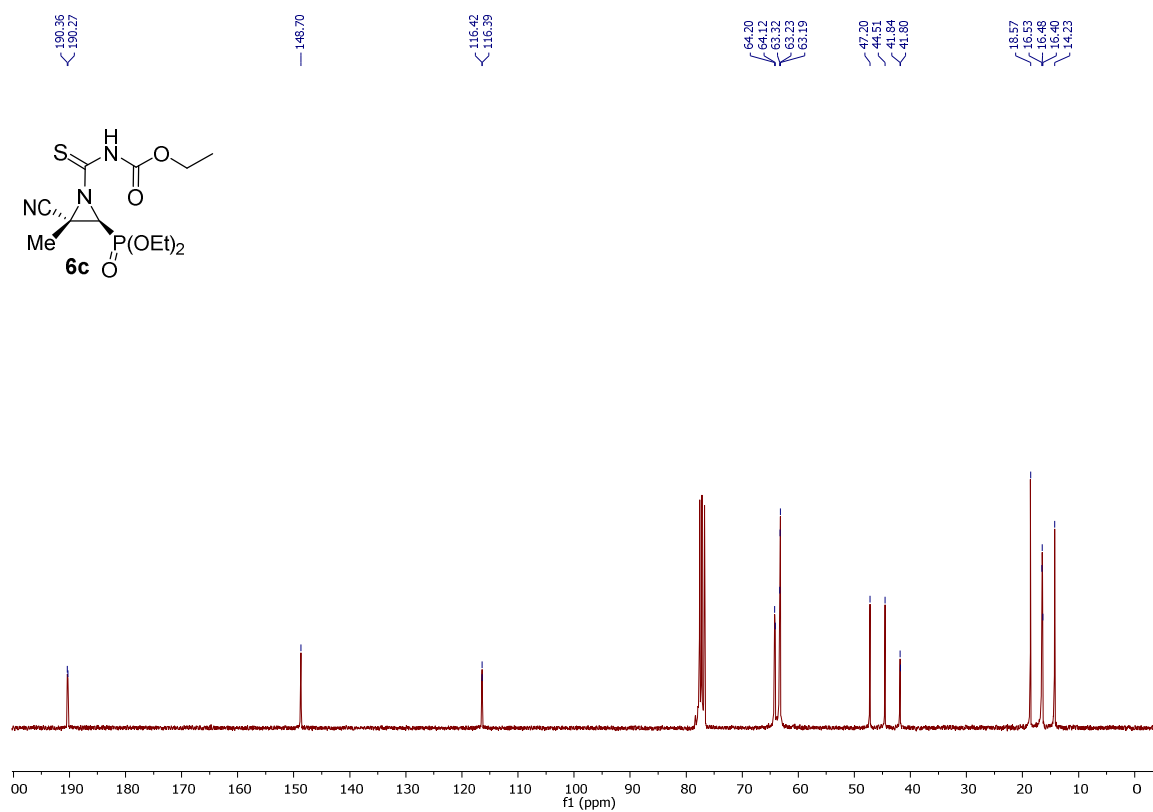

$^1\text{H}$  NMR (400 MHz,  $\text{CDCl}_3$ ) of compound **7a** or **7'a**.

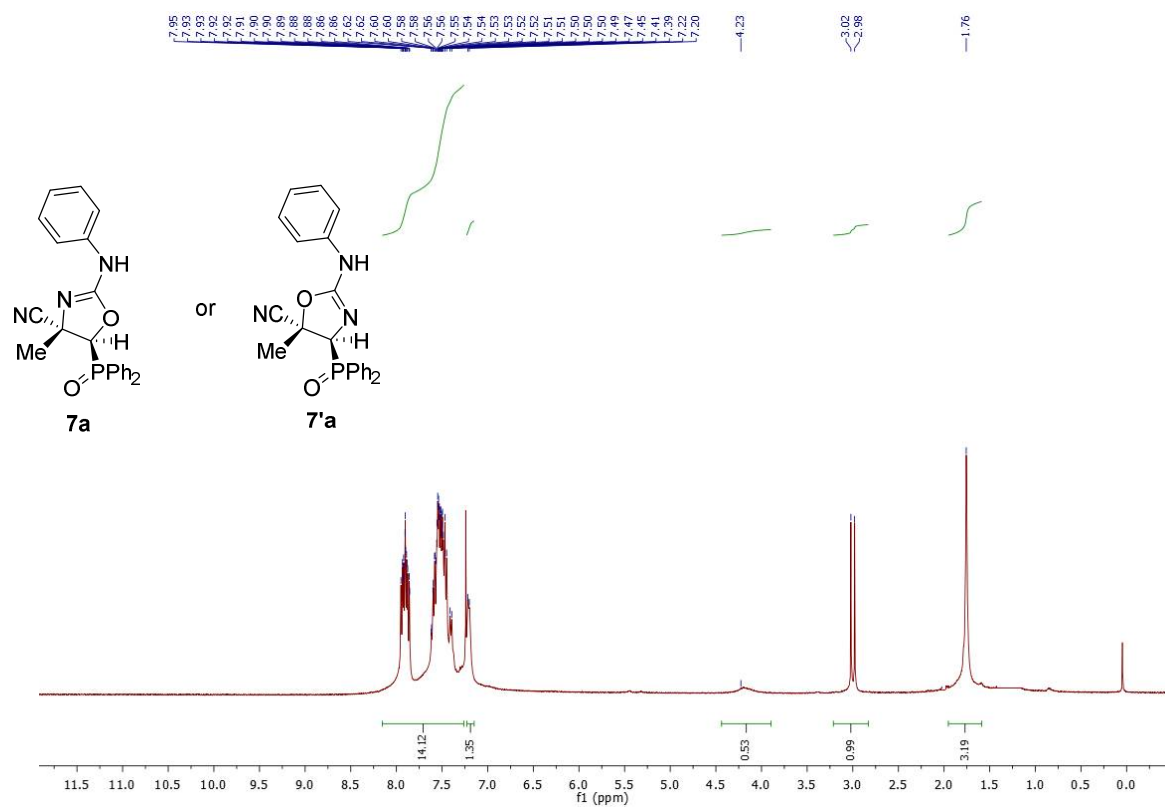

$^{13}\text{C}$   $\{^1\text{H}\}$  NMR (75 MHz,  $\text{CDCl}_3$ ) of compound **7a** or **7'a**.

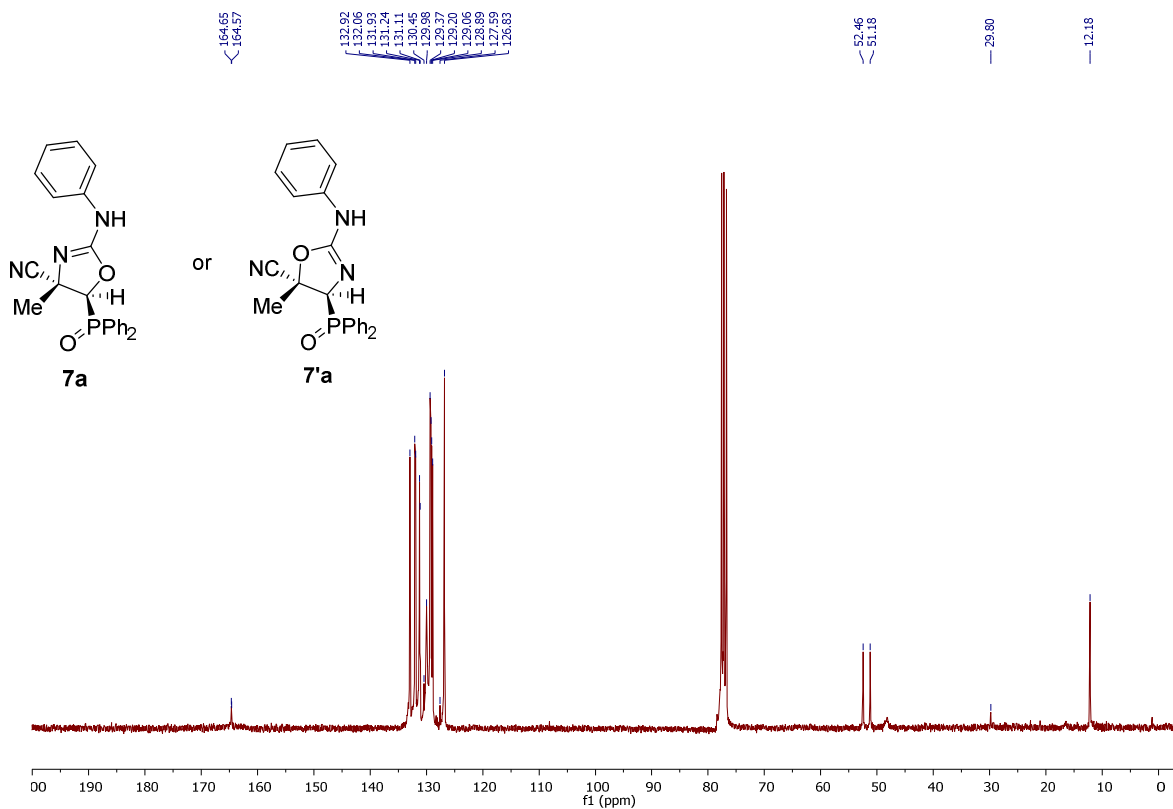

$^1\text{H}$  NMR (300 MHz,  $\text{CDCl}_3$ ) of compound **7b** + **7'b**.

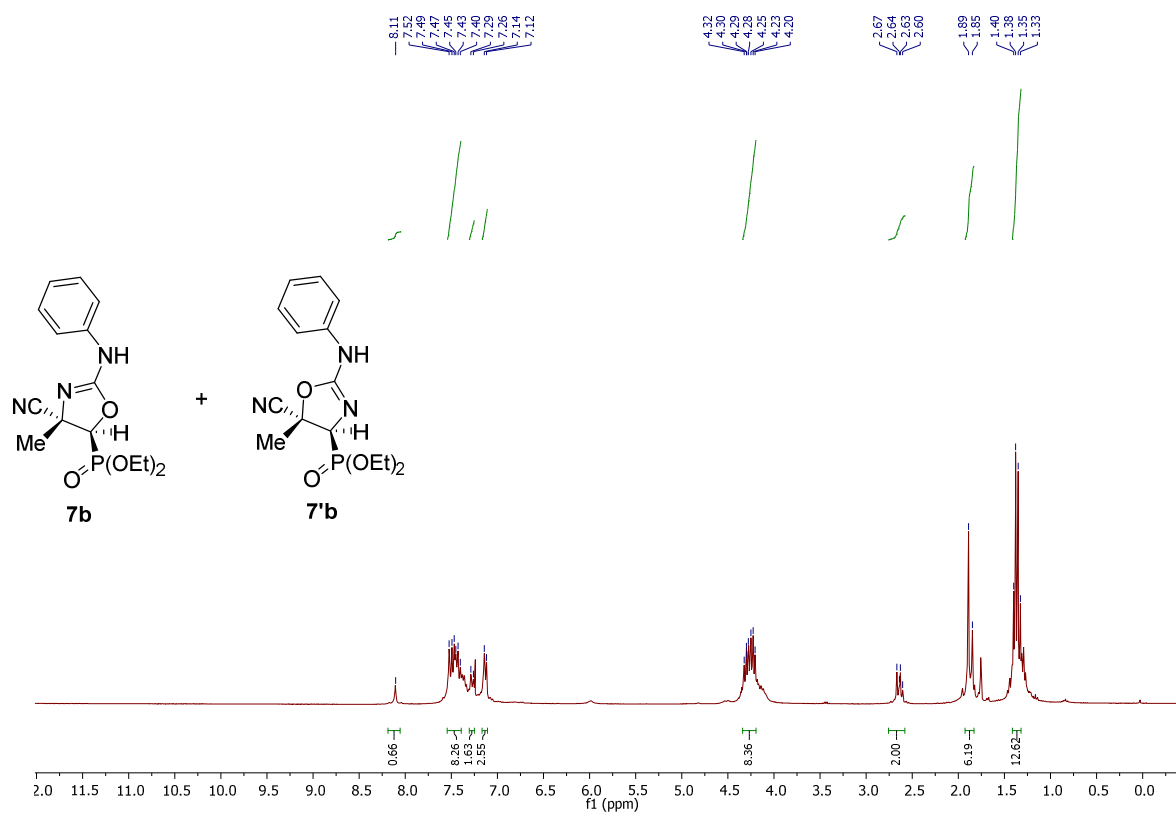

$^{13}\text{C}$  [ $^1\text{H}$ ] NMR (75 MHz,  $\text{CDCl}_3$ ) of compound **7b** + **7'b**.

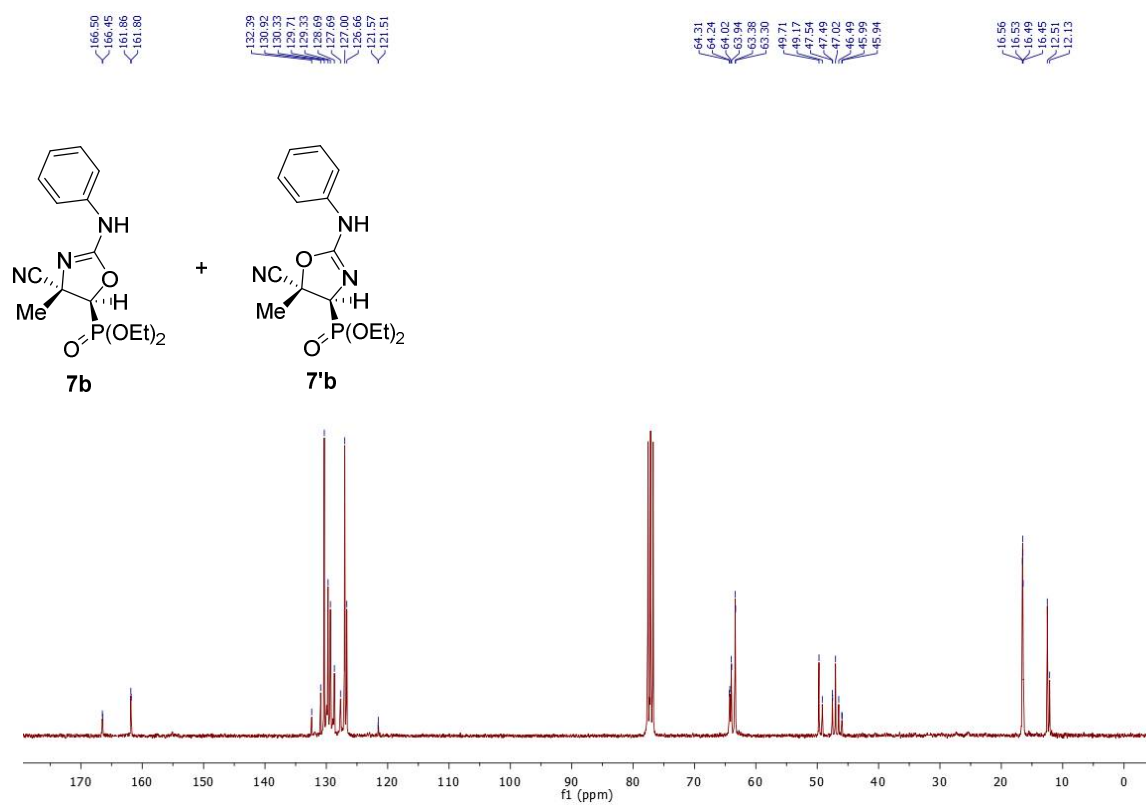

$^1\text{H}$  NMR (400 MHz,  $\text{CDCl}_3$ ) of compound **7c** + **7'c**.

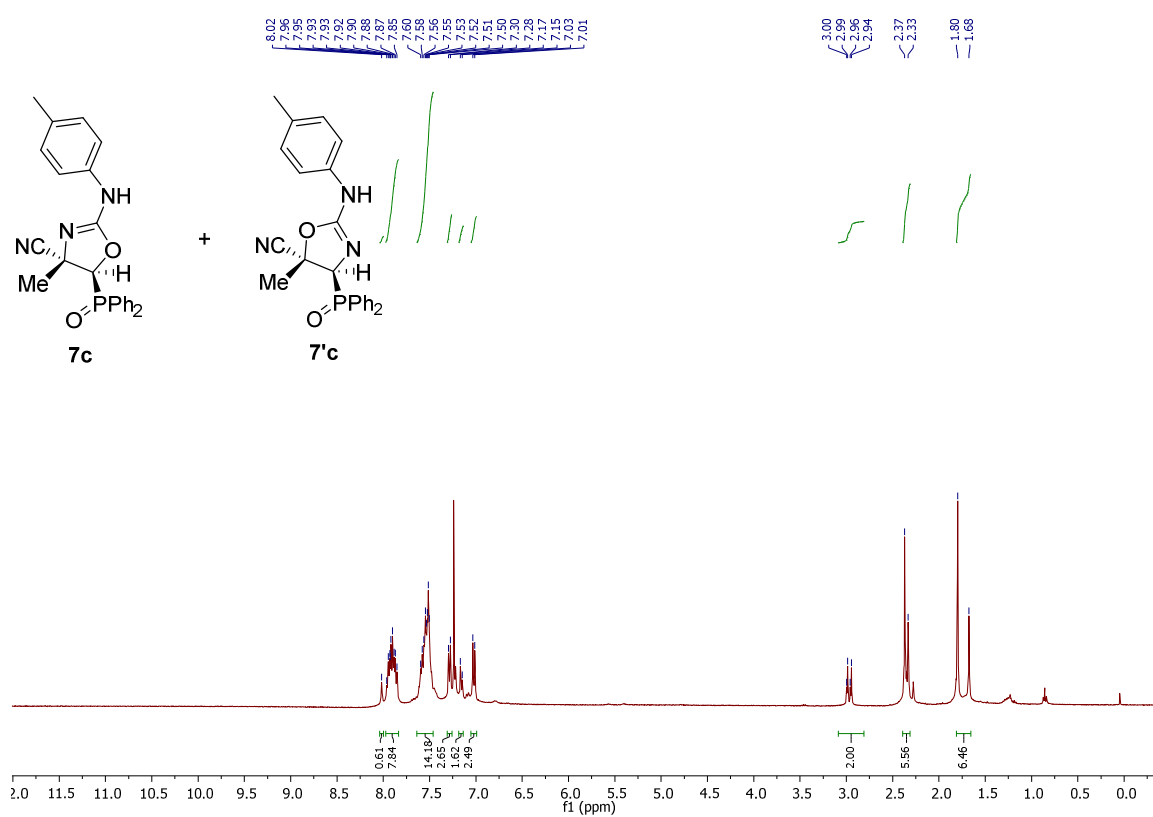

$^{13}\text{C}$  [ $^1\text{H}$ ] NMR (75 MHz,  $\text{CDCl}_3$ ) of compound **7c** + **7'c**.

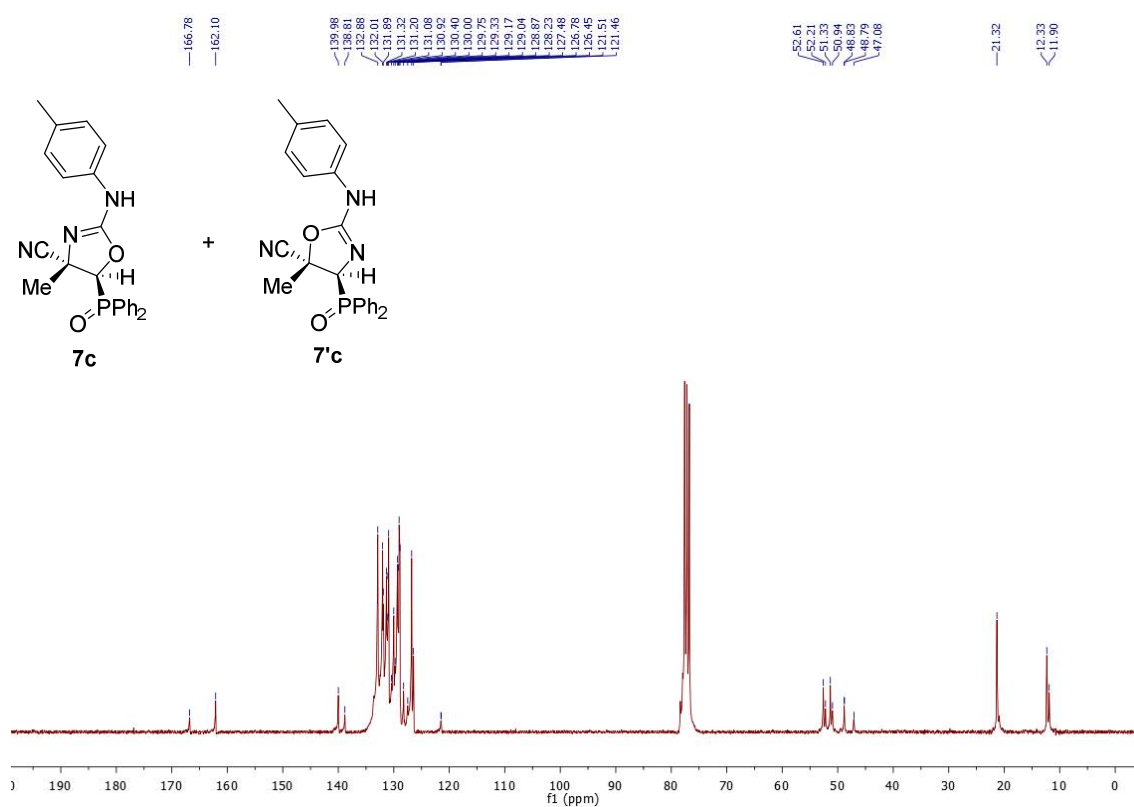

$^1\text{H}$  NMR (300 MHz,  $\text{CDCl}_3$ ) of compound **7d** + **7'd**.

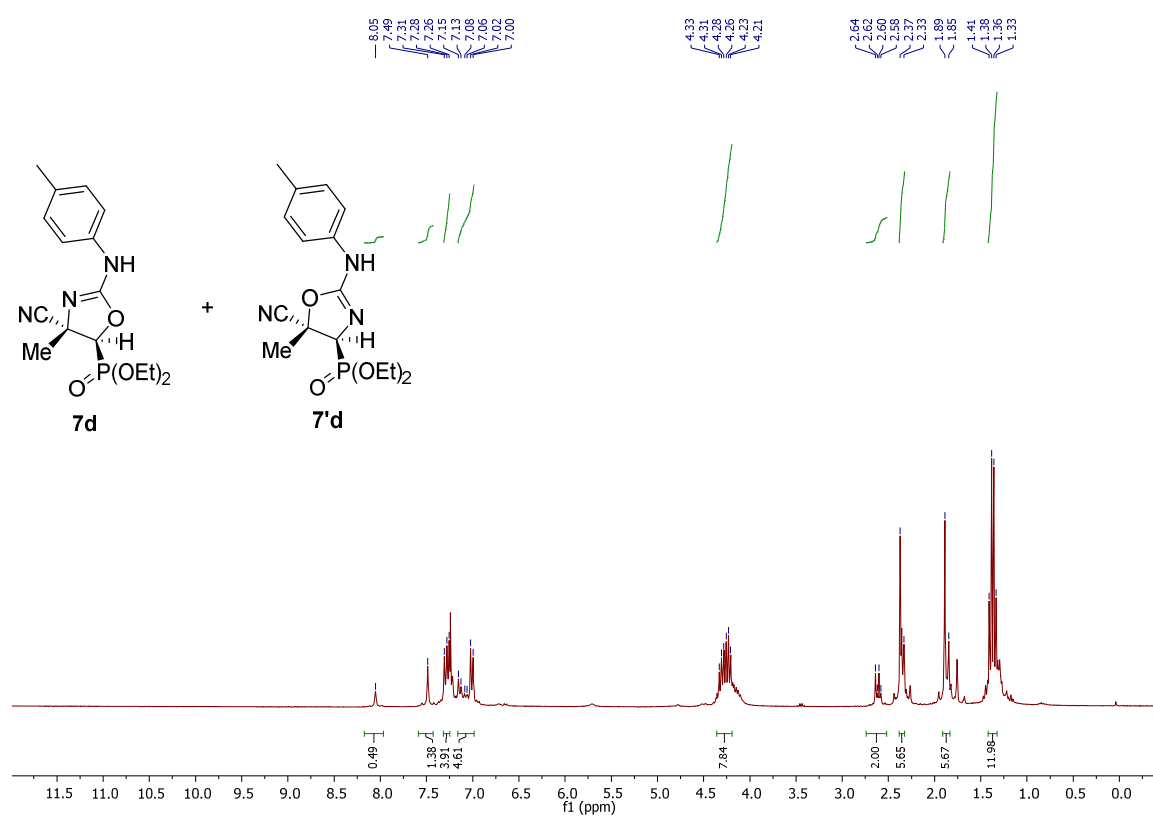

$^{13}\text{C}$  [ $^1\text{H}$ ] NMR (75 MHz,  $\text{CDCl}_3$ ) of compound **7d** + **7'd**.

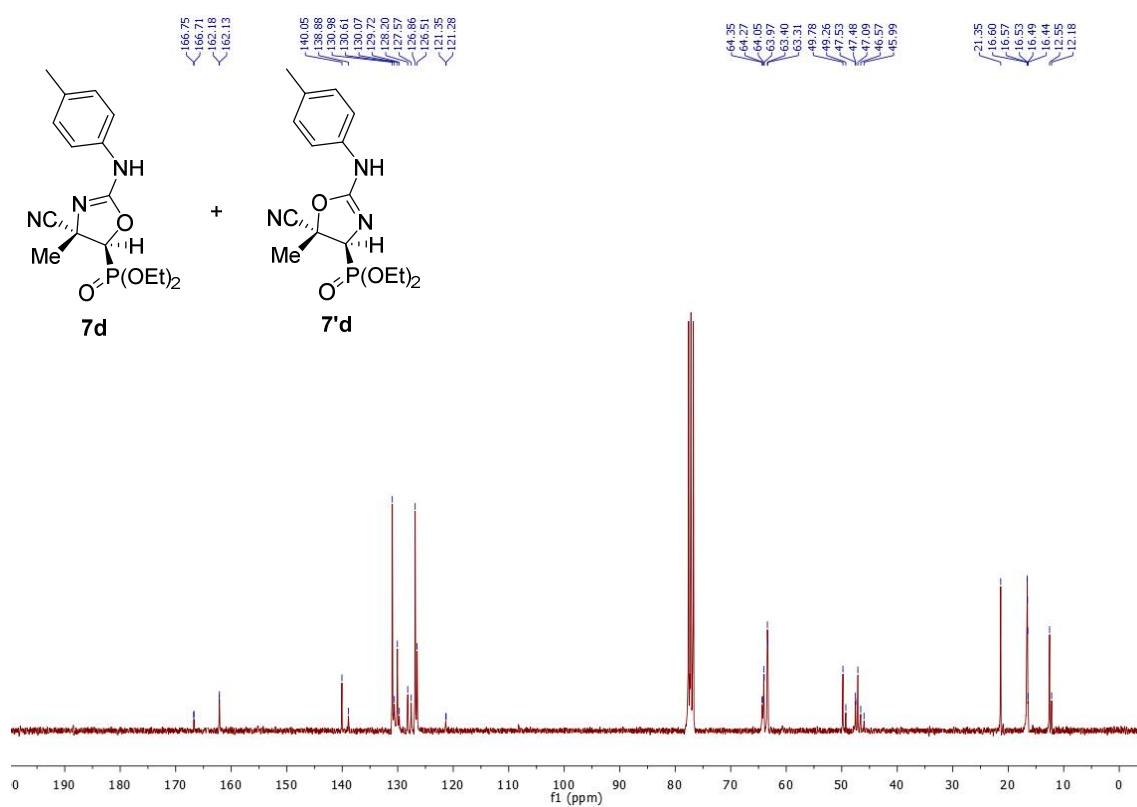

$^1\text{H}$  NMR (400 MHz,  $\text{CDCl}_3$ ) of compound **8a**.

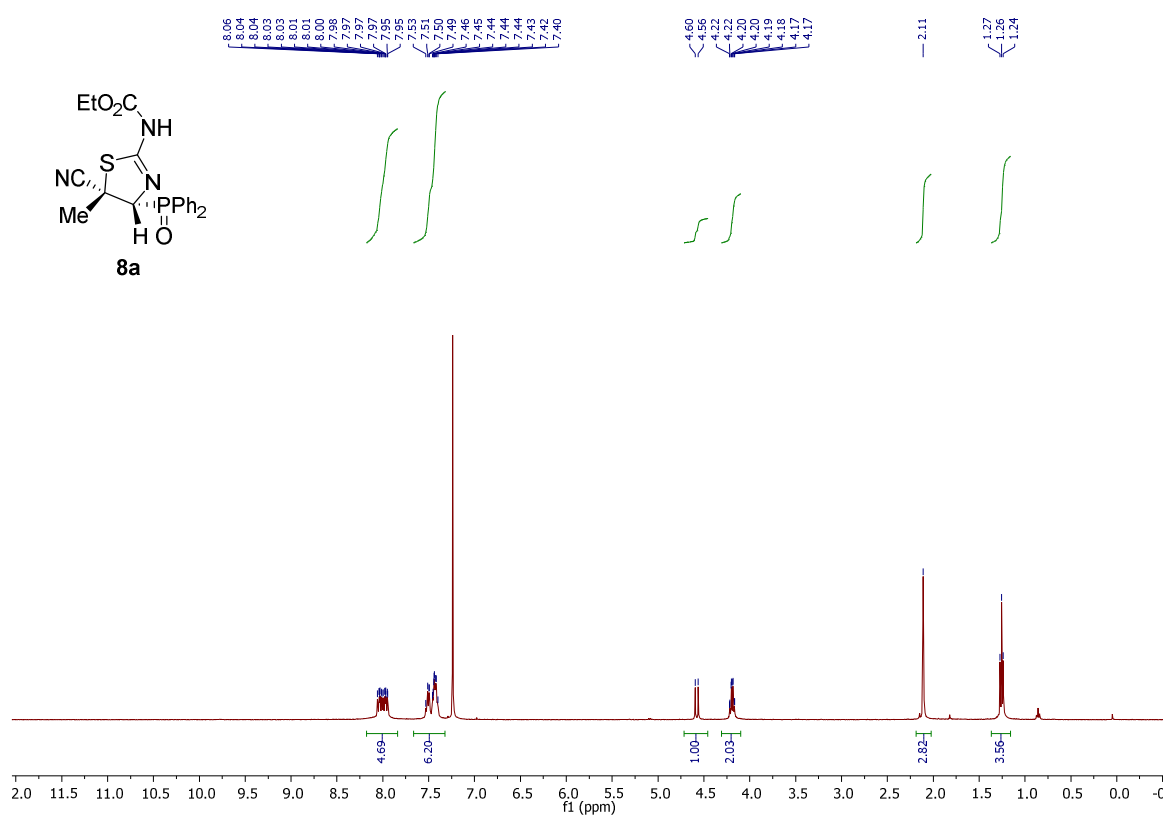

$^{13}\text{C}$  { $^1\text{H}$ } NMR (75 MHz,  $\text{CDCl}_3$ ) of compound **8a**.

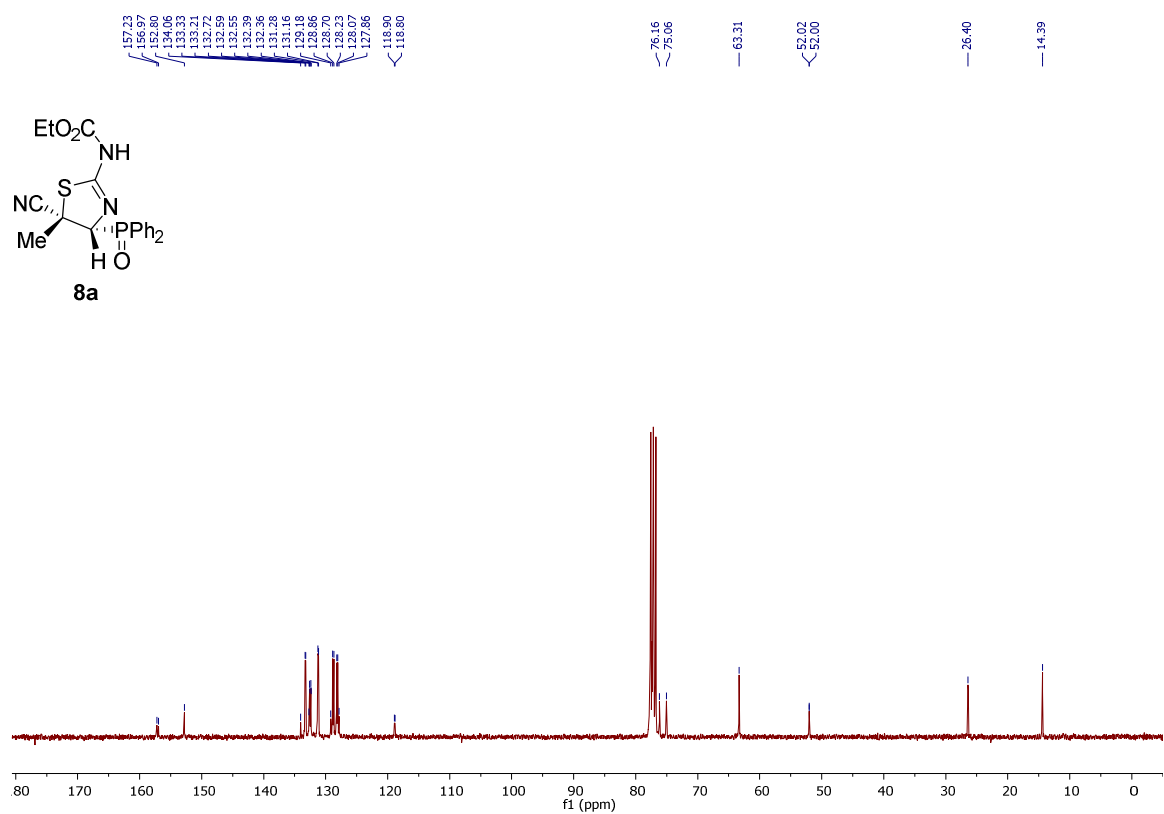



$^1\text{H}$  NMR (300 MHz,  $\text{CDCl}_3$ ) of compound **9a**.

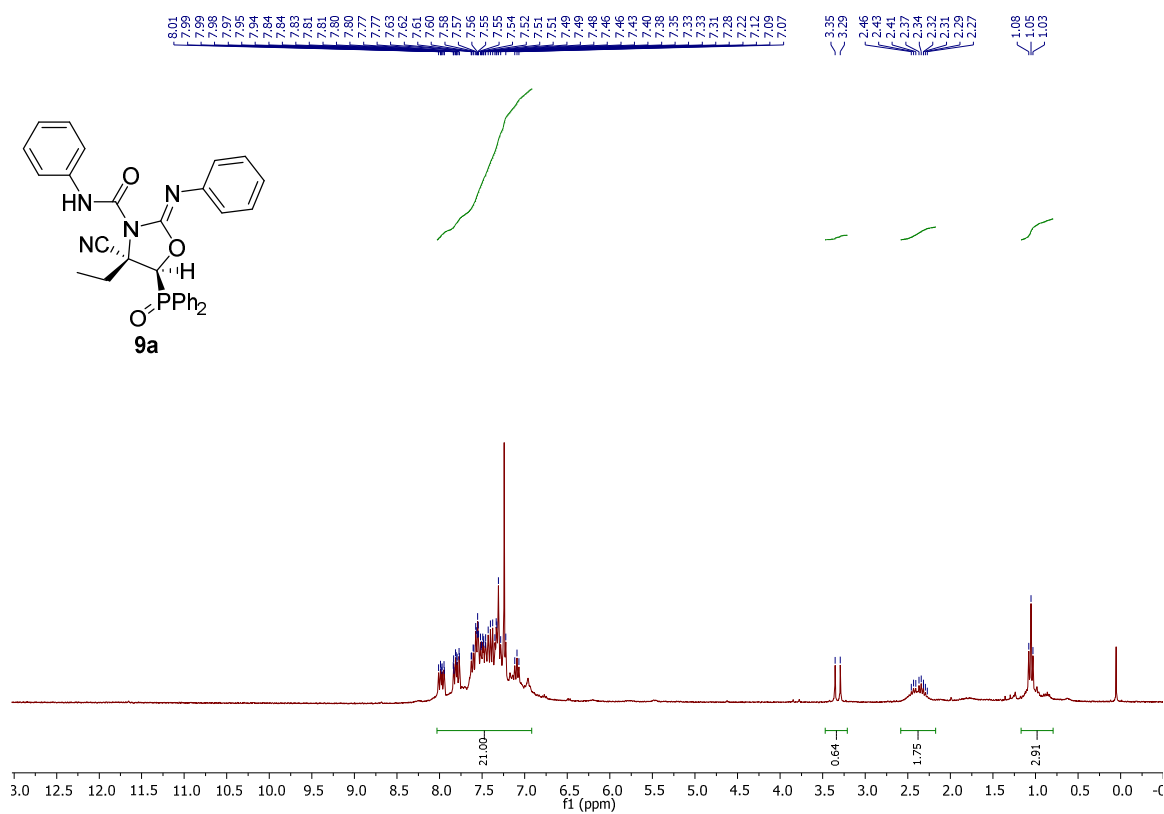

$^{13}\text{C}$  [ $^1\text{H}$ ] NMR (75 MHz,  $\text{CDCl}_3$ ) of compound **9a**.

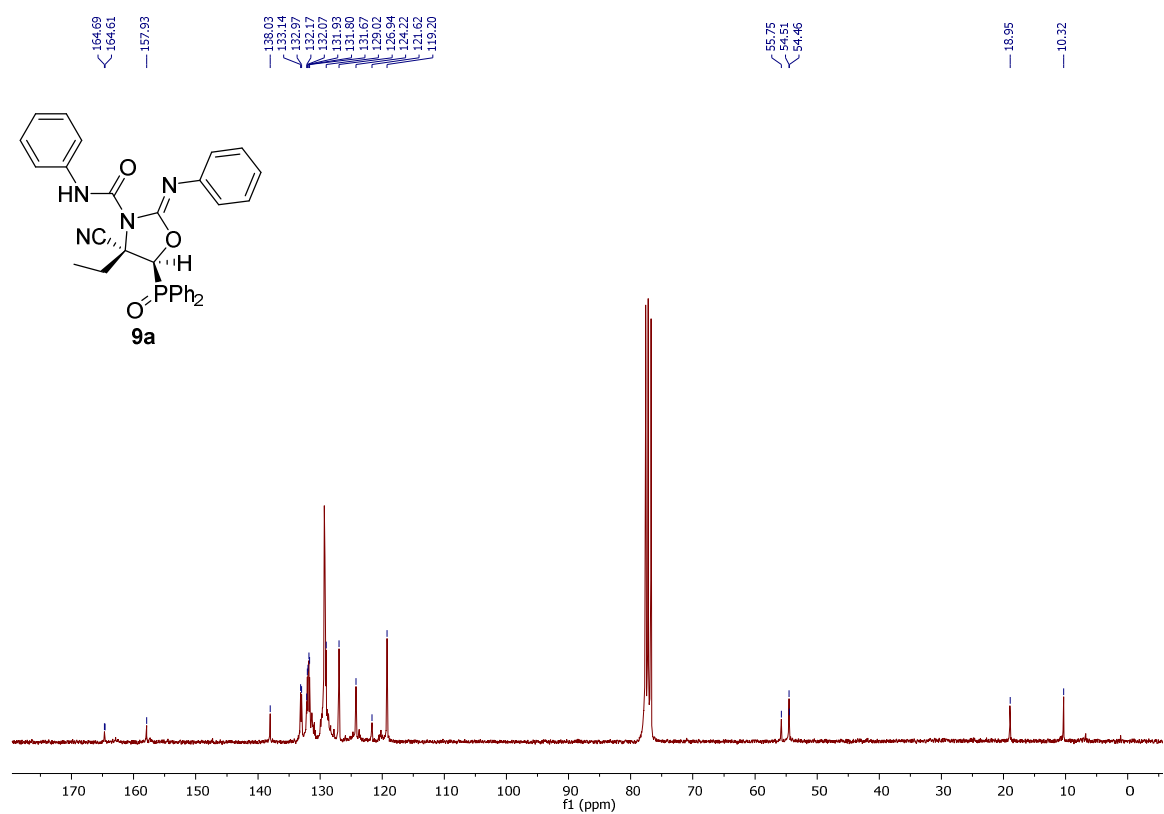

Chemical structure of **9b** is shown on the left. The <sup>1</sup>H NMR spectrum (CDCl<sub>3</sub>) is displayed on the right, with the following chemical shifts (δ) listed at the top: 8.03, 8.01, 8.00, 7.99, 7.98, 7.97, 7.96, 7.87, 7.84, 7.83, 7.82, 7.80, 7.80, 7.64, 7.63, 7.61, 7.60, 7.59, 7.58, 7.57, 7.56, 7.55, 7.55, 7.53, 7.51, 7.51, 7.31, 7.28, 7.22, 7.19, 7.14, 7.11, 7.08, 3.24, 3.18, 2.33, 2.29, and 1.91.

The spectrum shows a complex multiplet in the aromatic region (7.0–7.8 ppm) with an integration of 19.00. A doublet at 3.24 and 3.18 ppm has an integration of 0.66. A doublet at 2.33 and 2.29 ppm has an integration of 5.71. A doublet at 1.91 ppm has an integration of 2.79.

Chemical structure of **9b** is shown in the top left corner. The <sup>13</sup>C NMR spectrum (CDCl<sub>3</sub>) is displayed below the structure, with the x-axis labeled 'f1 (ppm)' ranging from 0 to 200. The spectrum shows several peaks, with the following chemical shifts (ppm) labeled above the corresponding peaks:

- 164.62
- 164.54
- 158.07
- 139.37
- 135.42
- 133.76
- 132.09
- 128.55
- 132.82
- 132.05
- 131.89
- 131.76
- 129.98
- 129.69
- 129.58
- 129.33
- 129.17
- 129.00
- 126.66
- 120.88
- 120.31
- 119.18
- 54.52
- 53.29
- 49.11
- 49.06
- 21.35
- 20.97
- 12.58

$^1\text{H}$  NMR (300 MHz,  $\text{CDCl}_3$ ) of compound **9c**.

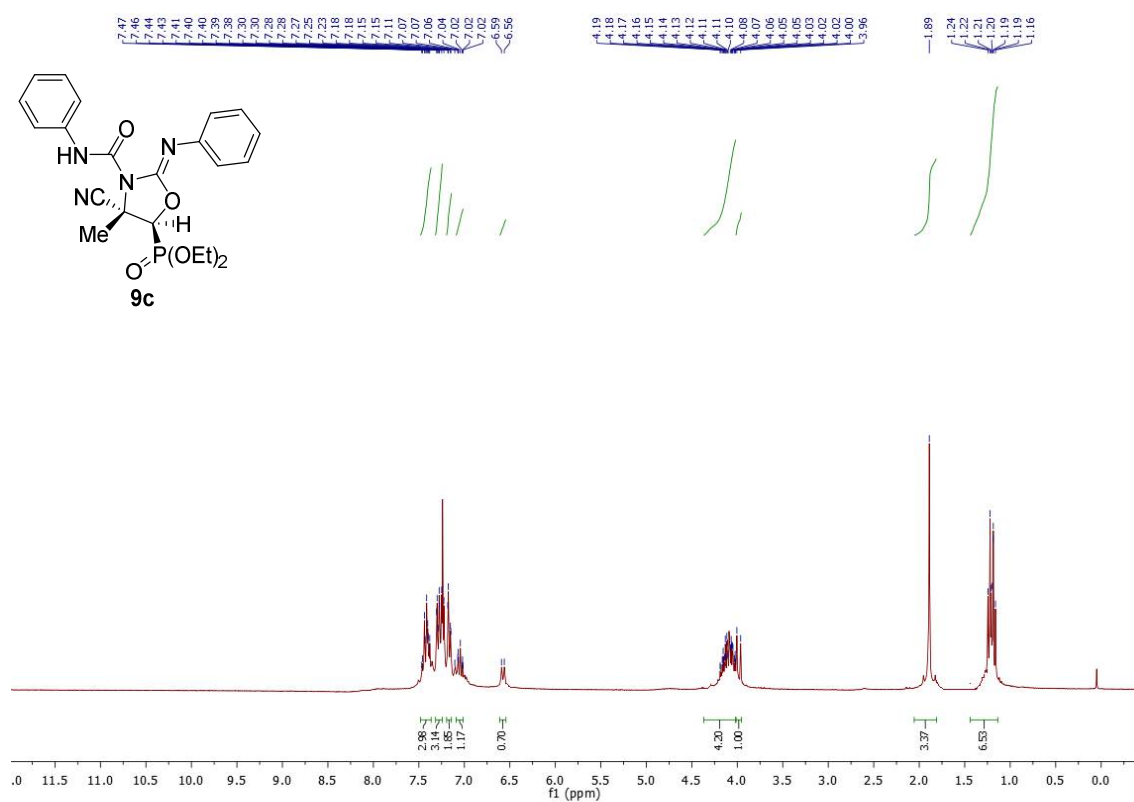

$^{13}\text{C}$  { $^1\text{H}$ } NMR (75 MHz,  $\text{CDCl}_3$ ) of compound **9c**.

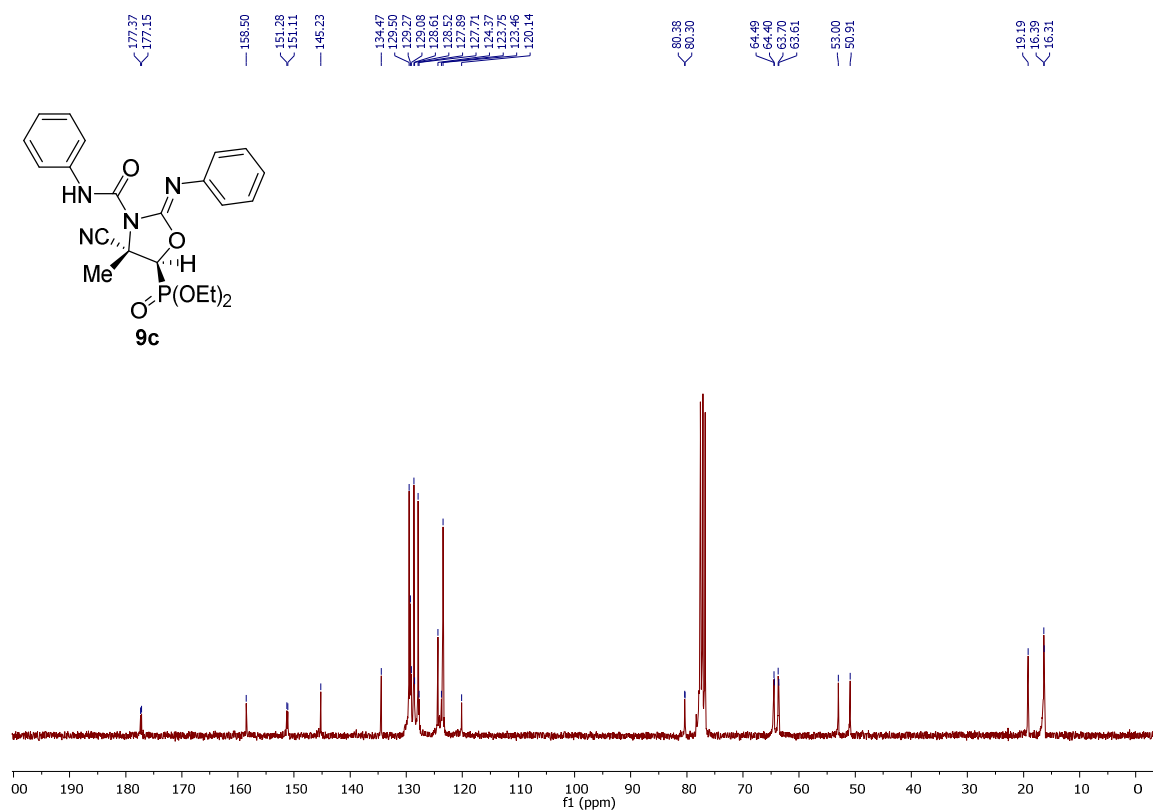

Supplement: s1 [file s1]
